# Supplementary material for: A six-coordinate high-spin Fe IV O species of cucurbit[5]uril: a highly potent catalyst for C–H hydroxylation of methane, if synthesised
Source: Royal Society of Chemistry journal article supplement (doi:10.1039/d1cc06391j), 2021-01-01
Supplement: d1cc06391j1.pdf [file d1cc06391j1.pdf]

## Supporting Information

### **A Six-Coordinate High-Spin Fe<sup>IV</sup>=O Species of Cucurbit[5]uril: A Highly Potent Catalyst for C-H Hydroxylation of Methane, If synthesised**

Ravi Kumar,<sup>[a]</sup> Mahesh Sundararajan<sup>\*[b]</sup> and Gopalan Rajaraman<sup>\*[a]</sup>

---

[a] Mr. Ravi Kumar, Prof. Dr. Gopalan Rajaraman  
Department of Chemistry  
Indian Institute of Technology Bombay, Powai  
Mumbai, India  
E-mail: [rajaraman@chem.iitb.ac.in](mailto:rajaraman@chem.iitb.ac.in)

[b] Prof. Mahesh Sundararajan  
Theoretical Chemistry Section, Bhabha  
Atomic Research Centre, Mumbai, India  
E-mail: [smahesh@barc.gov.in](mailto:smahesh@barc.gov.in)

## Computational details

In the present work, all the calculations were performed using established procedures.<sup>[1]</sup> Geometry optimization is carried out with Gaussian 09 Revision D.01,<sup>[2]</sup> whereas all spectroscopic parameters are calculated with the ORCA 4.0.1 program package incorporating COSMO solvation effects.<sup>[3]</sup> The geometries were optimized by using the Grimme's dispersion corrected unrestricted B3LYP functional (UB3LYP-D3).<sup>[4]</sup> We were carried out optimizations and frequency calculations with LANL2DZ ECP encompasses a double  $\zeta$ -quality basis set with the Los Alamos effective core potential for Fe and a 6-31G\* basis set for C, H, O;<sup>[5]</sup> then perform single-point energy calculations using a TZVP basis set for C, H, O, Fe.<sup>[6]</sup> Frequency calculations were performed on the optimized structures to verify that they are minima on the potential-energy surface (PES) and also to obtain free energy corrections. The quoted DFT energies are UB3LYP-D3 solvation including free-energy corrections with TZVP basis set at the temperature of 298.15 K, unless otherwise mentioned. The optimized geometries were verified by animating frequency by using Chemcraft software.<sup>[7]</sup> The solvation energies were computed at the UB3LYP-D3 level by using polarisable continuum model (PCM) with acetonitrile as a solvent.<sup>[8]</sup> In short, the DFT calculations were performed at B3LYP-D3/TZVP(PCM)//B3LYP-D3/LACVP\* level. We have also performed calculations using water as solvent (see Table S5) and found the energies being similar to MeCN. All spectroscopic parameter calculations incorporate a relativistic effect via a zeroth-order regular approximation method (ZORA) as implemented in ORCA suite.<sup>[3, 9]</sup> The Mössbauer isomer shift ( $\delta$ ) were calculated based on the calibration constants reported by Römelt et al. and 0.16 barn was used for the calculation of quadrupole moment of  $^{57}\text{Fe}$  nuclei.<sup>[10]</sup> We have performed the state average complete active space self-consistent field (SA-CASSCF) calculations incorporating the required excited states. We employed the def2-TZVP basis set during the zero field splitting (ZFS) calculations. The active space for CASSCF calculations comprises five  $\text{Fe}^{\text{IV}}$ -based orbitals with four electrons in them ( $d^4$  system; CAS(4,5) setup). We considered five quintet excited states, thirty five triplet excited states and twenty two singlet excited states in our calculations. The zero-field splitting are then extracted using effective Hamiltonian approach implemented in ORCA program.<sup>[11]</sup> Further Domain localised pair natural orbital CCSD(T) method, termed DLPNO-CCSD(T) was used to estimate accurate energies employing cc-pvTZ and No Frozen core and TIGHTPNO approximations with the optimized coordinates from DFT calculation using ORCA program.<sup>[1d, 3, 12]</sup>

## References

- [1] a) R. Kumar, B. Pandey, A. Sen, M. Ansari, S. Sharma, G. Rajaraman, *Coord. Chem. Rev.* **2020**, *419*, 213397; b) M. Jaccob, A. Ansari, B. Pandey, G. Rajaraman, *Dalton Trans.* **2013**, *42*, 16518-16526; c) A. Ansari, A. Kaushik, G. Rajaraman, *J. Am. Chem. Soc.* **2013**, *135*, 4235-4249; d) P. Comba, D. Faltermeier, S. Krieg, B. Martin, G. Rajaraman, *Dalton Trans.* **2020**, *49*, 2888-2894; e) M. Atanasov, P. Comba, B. Martin, V. Müller, G. Rajaraman, H. Rohwer, S. Wunderlich, *J. Comput. Chem.* **2006**, *27*, 1263-1277; f) A. Sen, N. Vyas, B. Pandey, G. Rajaraman, *Dalton Trans.* **2020**, *49*, 10380-10393; g) A. Sen, N. Vyas, B. Pandey, M. Jaccob, G. Rajaraman, *Isr. J. Chem.* **2020**, *60*, 973-986; h) B. Pandey,

- A. Ansari, N. Vyas, G. Rajaraman, *J. Chem. Sci.* **2015**, *127*, 343-352; i)M. A. Hay, A. Sarkar, K. E. Marriott, C. Wilson, G. Rajaraman, M. Murrice, *Dalton Trans.* **2019**, *48*, 15480-15486; j)R. Kumar, B. Pandey, G. Rajaraman, *J. Indian Chem. Soc* **2019**, *96*, 825-836; k)R. Kumar, M. Katari, A. Choudhary, G. Rajaraman, P. Ghosh, *Inorg. Chem.* **2017**, *56*, 14859-14869; l)R. Kumar, A. Ansari, G. Rajaraman, *Chem. Eur. J.* **2018**, *24*, 6818-6827; m)A. Ansari, M. Ansari, A. Singha, G. Rajaraman, *Chem. Eur. J.* **2017**, *23*, 10110-10125; n)M. Ansari, D. Senthilnathan, G. Rajaraman, *Chem. Sci.* **2020**, *11*, 10669-10687; o)M. Sundararajan, B. Park, M.-H. Baik, *Inorg. Chem.* **2019**, *58*, 16250-16255.
- [2] M. J. Frisch, G. W. Trucks, H. B. Schlegel, G. E. Scuseria, M. A. Robb, J. R. Cheeseman, G. Scalmani, V. Barone, G. A. Petersson, H. Nakatsuji, X. Li, M. Caricato, A. V. Marenich, J. Bloino, B. G. Janesko, R. Gomperts, B. Mennucci, H. P. Hratchian, J. V. Ortiz, A. F. Izmaylov, J. L. Sonnenberg, Williams, F. Ding, F. Lipparini, F. Egidi, J. Goings, B. Peng, A. Petrone, T. Henderson, D. Ranasinghe, V. G. Zakrzewski, J. Gao, N. Rega, G. Zheng, W. Liang, M. Hada, M. Ehara, K. Toyota, R. Fukuda, J. Hasegawa, M. Ishida, T. Nakajima, Y. Honda, O. Kitao, H. Nakai, T. Vreven, K. Throssell, J. A. Montgomery Jr., J. E. Peralta, F. Ogliaro, M. J. Bearpark, J. J. Heyd, E. N. Brothers, K. N. Kudin, V. N. Staroverov, T. A. Keith, R. Kobayashi, J. Normand, K. Raghavachari, A. P. Rendell, J. C. Burant, S. S. Iyengar, J. Tomasi, M. Cossi, J. M. Millam, M. Klene, C. Adamo, R. Cammi, J. W. Ochterski, R. L. Martin, K. Morokuma, O. Farkas, J. B. Foresman, D. J. Fox, Wallingford, CT, **2009**.
- [3] F. Neese, *Wiley Interdiscip. Rev. Comput. Mol. Sci.* **2012**, *2*, 73-78.
- [4] S. Grimme, *J. Comput. Chem.* **2006**, *27*, 1787-1799.
- [5] a)R. Ditchfield, W. J. Hehre, J. A. Pople, *J. Chem. Phys.* **1971**, *54*, 724-728; b)P. J. Hay, W. R. Wadt, *J. Chem. Phys.* **1985**, *82*, 270-283; c)W. R. Wadt, P. J. Hay, *J. Chem. Phys.* **1985**, *82*, 284-298; d)P. J. Hay, W. R. Wadt, *J. Chem. Phys.* **1985**, *82*, 299-310.
- [6] a)A. Schäfer, C. Huber, R. Ahlrichs, *J. Chem. Phys.* **1994**, *100*, 5829-5835; b)A. Schäfer, H. Horn, R. Ahlrichs, *J. Chem. Phys.* **1992**, *97*, 2571-2577.
- [7] G. Zhurko, D. Zhurko, URL: <http://www.chemcraftprog.com> **2009**.
- [8] B. Mennucci, *Wiley Interdiscip. Rev. Comput. Mol. Sci.* **2012**, *2*, 386-404.
- [9] M. Radoul, M. Sundararajan, A. Potapov, C. Riplinger, F. Neese, D. Goldfarb, *Phys. Chem. Chem. Phys.* **2010**, *12*, 7276-7289.
- [10] M. Römel, S. Ye, F. Neese, *Inorg. Chem.* **2009**, *48*, 784-785.
- [11] F. Neese, *J. Am. Chem. Soc.* **2006**, *128*, 10213-10222.
- [12] a)S. E. Neale, D. A. Pantazis, S. A. Macgregor, *Dalton Trans.* **2020**, *49*, 6478-6487; b)F. Neese, *Wiley Interdiscip. Rev. Comput. Mol. Sci.* **2018**, *8*, e1327.

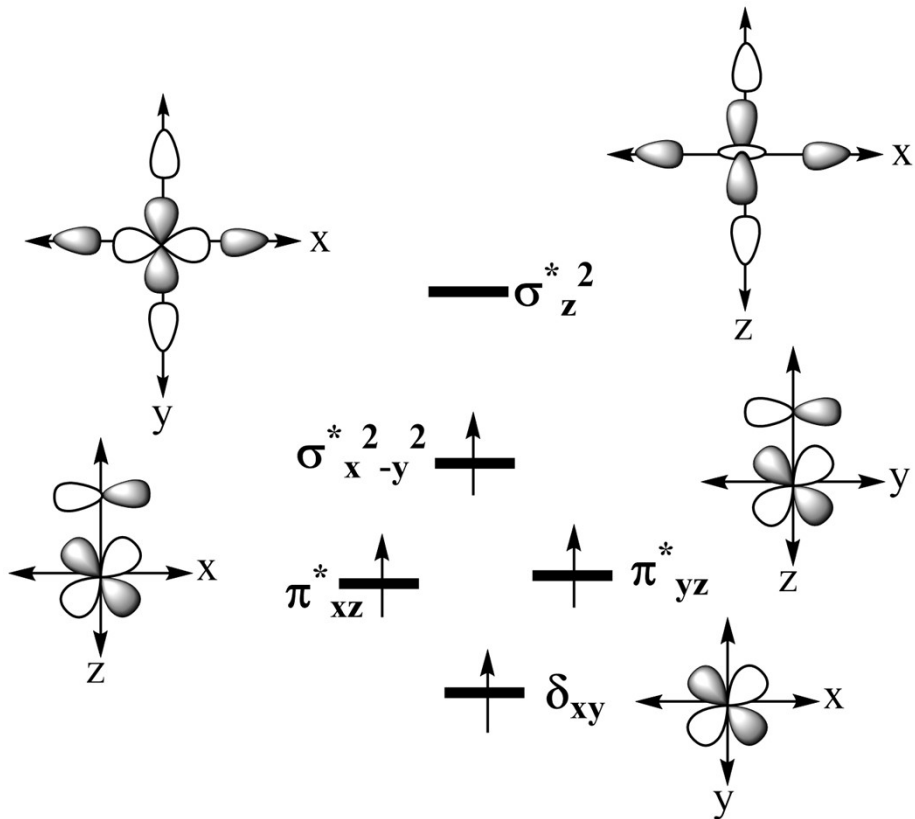

(a)

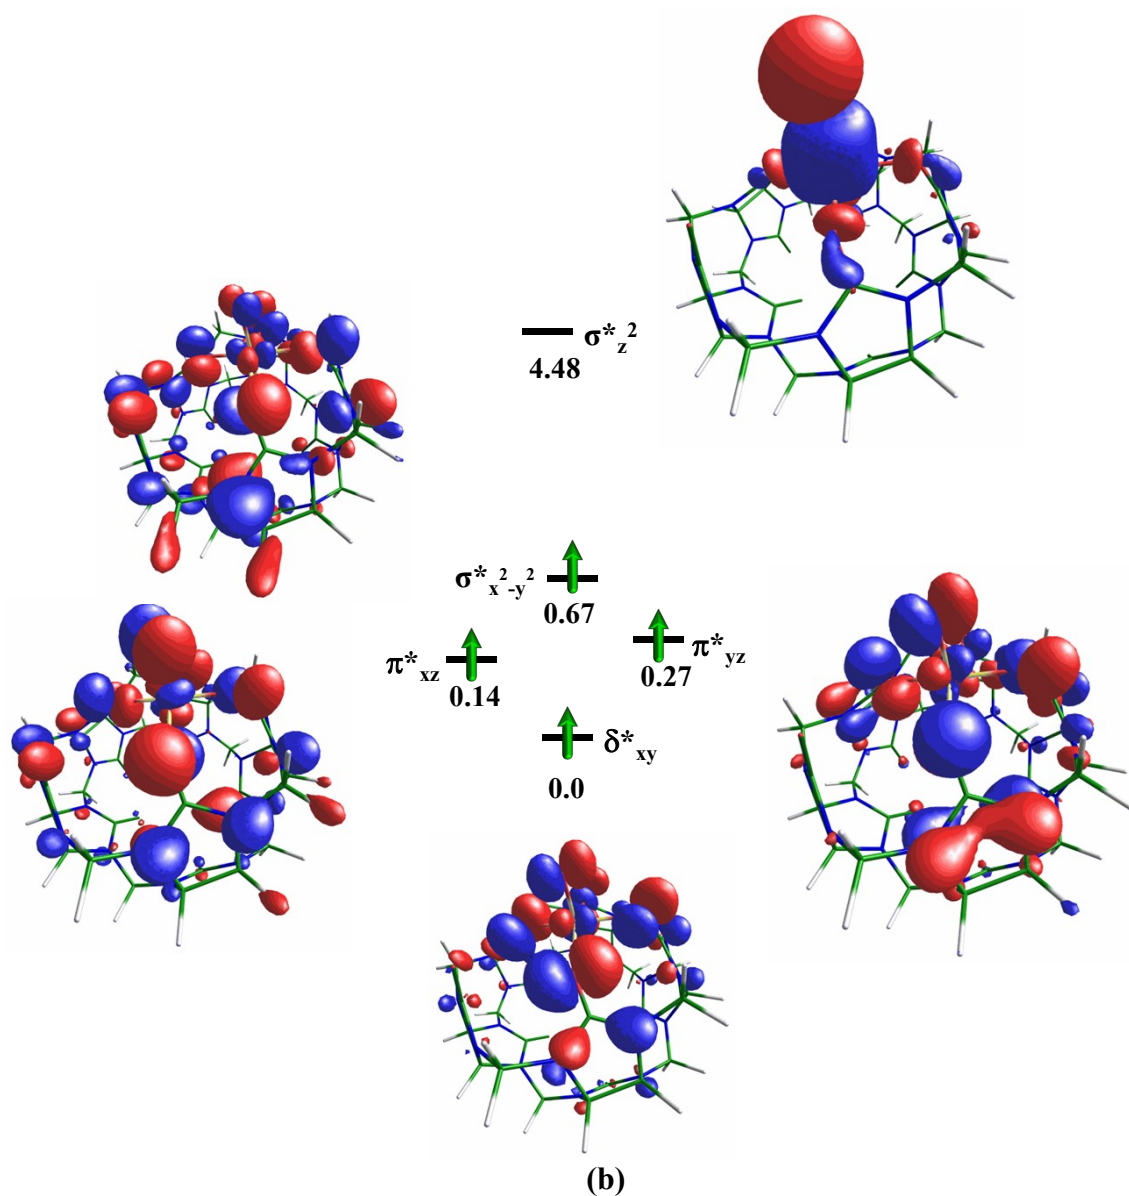

**Figure S1.** (a) Qualitative MO diagram for high-spin iron(IV)-oxo species and (b) Electronic structure and molecular orbitals of ground state (S=1) of the species **1** (in eV). The contour value used here is 0.03 a.u.

**Table S1.** Reported Fe-O bond distance in Fe<sup>IV</sup>=O and Fe<sup>V</sup>=O moieties (in Å).

| Species                                                                     | Fe-O                                    | reference                                                                                                       |
|-----------------------------------------------------------------------------|-----------------------------------------|-----------------------------------------------------------------------------------------------------------------|
| CPO-I                                                                       | 1.65<br>(exp.)                          | <i>Proc. Natl. Acad. Sci. U.S.A</i> <b>2005</b> , 102 (46), 16563-16565.                                        |
| TauD-J                                                                      | 1.62<br><br>(exp.)                      | <i>Inorg. Chem.</i> <b>2005</b> , 44 (4), 742-757.                                                              |
| [(H <sub>2</sub> O) <sub>5</sub> Fe <sup>IV</sup> =O] <sup>2+</sup>         | 1.62<br><br>(DFT)                       | <i>Angew. Chem. Int. Ed.</i> <b>2005</b> , 44, 6871–6874                                                        |
| [(TMG <sub>3</sub> tren)Fe <sup>IV</sup> =O] <sup>2+</sup>                  | 1.648<br>(DFT)<br>and 1.65<br>(exp.)    | <i>Angew. Chem. Int. Ed.</i> <b>2009</b> , 48, 3622–3626; <i>J. Am. Chem. Soc.</i> <b>2010</b> , 132, 8635–8644 |
| [(H <sub>3</sub> buea)Fe <sup>IV</sup> =O] <sup>-</sup>                     | 1.68<br>(exp.)                          | <i>J. Am. Chem. Soc.</i> <b>2010</b> , 132, 12188–12190                                                         |
| [(Me <sub>4</sub> cy)Fe <sup>IV</sup> =O(CH <sub>3</sub> CN)] <sup>2+</sup> | 1.64<br>(DFT)<br>and<br>1.646<br>(exp.) | <i>Science</i> <b>2003</b> , 299, 1037–1039                                                                     |
| [(Me <sub>4</sub> cyS)Fe <sup>IV</sup> =O] <sup>+</sup>                     | 1.68<br>(DFT)<br>and 1.70<br>(exp.)     | <i>Science</i> <b>2005</b> , 310, 1000–1002                                                                     |
| [(TAML)Fe <sup>V</sup> =O] <sup>-</sup>                                     | 1.60<br>(DFT)<br>and 1.58<br>(exp.)     | <i>Science</i> <b>2007</b> , 315, 835–838                                                                       |

|                                  |               |           |
|----------------------------------|---------------|-----------|
| $[(CB5)Fe^{IV}=O(H_2O)]^{2+}(1)$ | 1.60<br>(DFT) | This Work |
|----------------------------------|---------------|-----------|

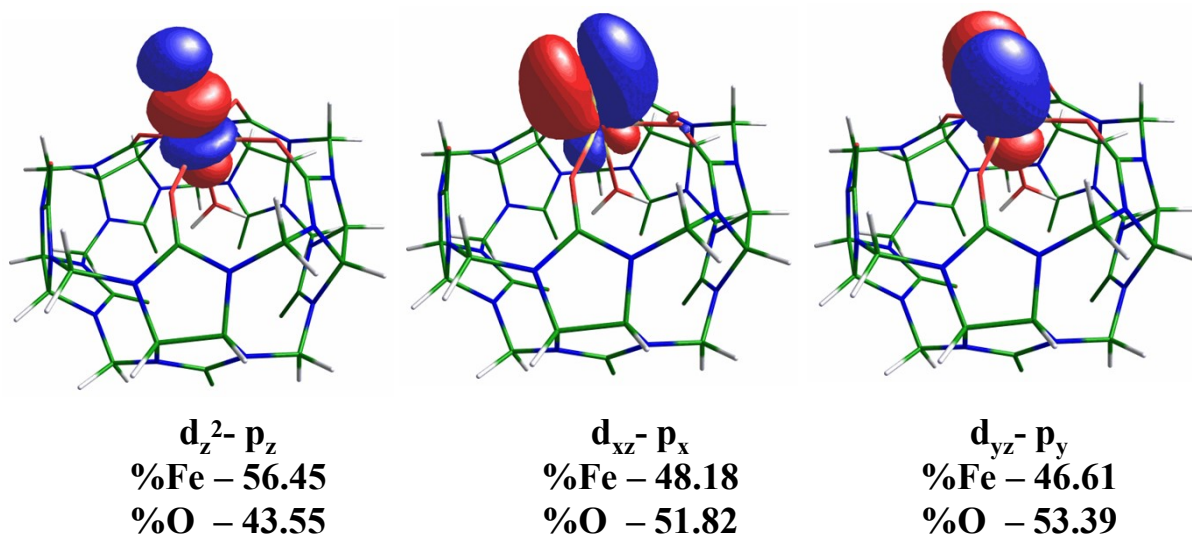

**Figure S2.** NBO diagram for selective bonds for the ground state of **1** showing  $\sigma$ -bonding and  $\pi$ -bonding interaction between  $Fe^{IV}$  and O atoms of  $Fe^{IV}=O$  moiety. The contour value used here is 0.03 a.u.

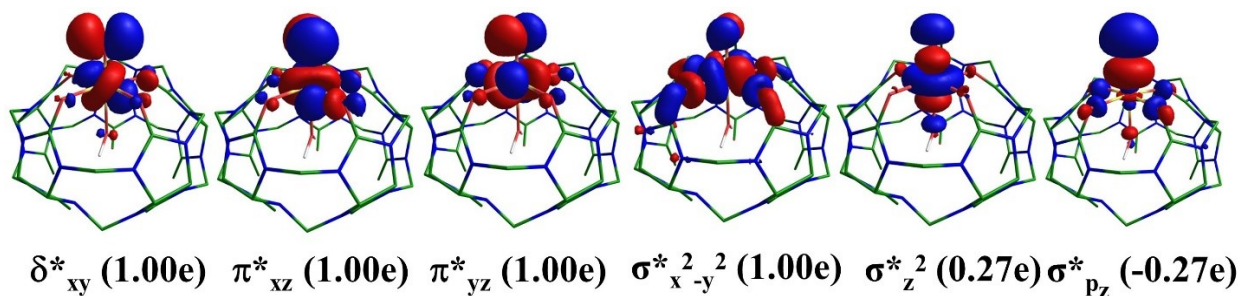

**Figure S3.** Spin natural orbitals (SNOs) and their occupations in species **1**. Here, negative sign in the occupation number signifies the  $\beta$  spin electrons and others are  $\alpha$  spin electrons. The contour value used here is 0.03 a.u.

### Thermodynamic Analysis of formation of $[(CB)Fe^{IV}(=O)(H_2O)]^{2+}$ (**1**)

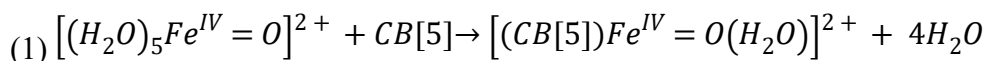

$$\Delta G = -71.8 \text{ kJ/mol}$$

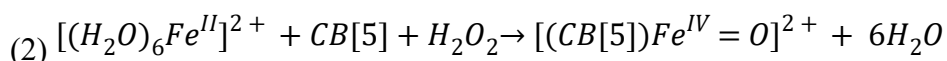

$$\Delta G = -73.6 \text{ kJ/mol}$$

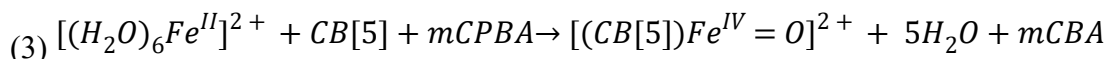

$$\Delta G = -70.4 \text{ kJ/mol}$$

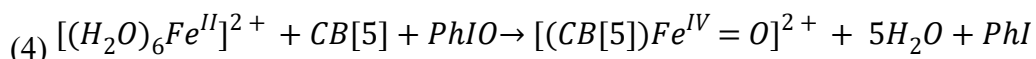

$$\Delta G = -134.9 \text{ kJ/mol}$$

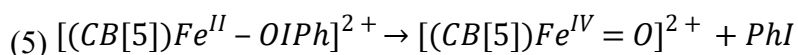

$$\Delta G = -30.8 \text{ kJ/mol}$$

**Table S2:** Previous reports on C-H activation of DHA, methane and ethane by Fe<sup>IV</sup>=O

| Complex                         | Substrate | $\Delta G^\ddagger$ (kJ/mol) | Reference                                                                                    |
|---------------------------------|-----------|------------------------------|----------------------------------------------------------------------------------------------|
| $[(TMC)Fe^{IV}=O(CH_3CN)]^{2+}$ | DHA       | 70.6                         | Siegbahn & Coworkers, <i>J. Phys. Chem. C</i> <b>2007</b> , <i>111</i> , 12397-12406.        |
| $[(TMC)Fe^{IV}=O(CF_3CO_2)]^+$  |           | 60.6                         |                                                                                              |
| $[(H_3buea)Fe^{IV}=O]^-$        |           | 109.1                        | Borovik, Shaik & Coworkers, <i>J. Am. Chem. Soc.</i> <b>2013</b> , <i>135</i> , 17090–17104. |
| $[(H1^{cyp})Fe^{IV}=O]^-$       |           | 88.2                         |                                                                                              |
| $[(N4Py)Fe^{IV}=O]^{2+}$        |           | 36.8                         |                                                                                              |
| Cpd-I of HRP                    |           | 59.4                         | Eldik & Coworkers, <i>Chem. Eur. J.</i> <b>2014</b> , <i>20</i> , 14437 – 14450.             |
| Cpd-II of HRP                   |           | 68.6                         |                                                                                              |
| $[(TMC)Fe^{IV}=O(CH_3CN)]^{2+}$ |           | 108.3                        | Shaik & Coworker, <i>J. Am. Chem. Soc.</i>                                                   |



|                                                                              |        |       |                                                                                      |
|------------------------------------------------------------------------------|--------|-------|--------------------------------------------------------------------------------------|
| $[(\text{TMC})\text{Fe}^{\text{IV}}=\text{O}(\text{CH}_2\text{S})]^+$        |        | 110.4 | <b>2015</b> , 137, 722–733.                                                          |
| $[(\text{TMC})\text{Fe}^{\text{IV}}=\text{O}(\text{N}_3)]^+$                 |        | 106.2 |                                                                                      |
| Cpd I                                                                        |        | 38.9  | Visser & Coworker<br><i>Chem. Eur. J.</i> <b>2015</b> ,<br>21, 9083-9092.            |
| $[(\text{Bn-TPEN})\text{Fe}^{\text{IV}}=\text{O}]^{2+}$                      |        | 60.2  | Shaik & Coworker, <i>J. Am. Chem. Soc.</i> <b>2016</b> , 138,<br>2094–2097.          |
| $[(\text{TMG3tren})\text{Fe}^{\text{IV}}=\text{O}]^{2+}$                     |        | 60.2  | Que, Cramer &<br>Coworker <i>Chem. Commun.</i> , <b>2016</b> , 52,<br>10509—10512.   |
| $[\text{TMG}_2\text{dien}(\text{MeCN})\text{Fe}^{\text{IV}}=\text{O}]^{2+}$  |        | 45.6  |                                                                                      |
| $[(6\text{-PhTPA})\text{Fe}^{\text{IV}}=\text{O}]^{2+}$                      |        | 58.3  | Rajraman &<br>Coworker <i>Chem. Commun.</i> <b>2017</b> , 53,<br>3193-3196.          |
| $[(\text{TPFPP})\text{Fe}^{\text{IV}}=(\text{O})]^{2+}$                      |        | 73.6  | Shaik & Coworker, <i>J. Am. Chem. Soc.</i> <b>2017</b> , 139, 11451-<br>11459.       |
| $[(\text{TMP})\text{Fe}^{\text{IV}}=(\text{O})]^{2+}$                        |        | 84.9  |                                                                                      |
| $[(\text{CB5})\text{Fe}^{\text{IV}}=\text{O}(\text{H}_2\text{O})]^{2+}$      |        | 2.2   | This work                                                                            |
| Cpd I                                                                        | Ethane | 88.3  | Yoshizawa &<br>Coworkers, <i>J. Phys. Chem. B</i> <b>2000</b> , 104,<br>12365-12370. |
| $\text{Fe}_{0.1}\text{Mg}_{1.9}(\text{dobdc})\text{Fe}^{\text{IV}}=\text{O}$ |        | 58.0  | Gagliardi, Truhler &<br>Coworkers, <i>J. Am. Chem. Soc.</i> <b>2015</b> , 137,       |

|                                                                |         |       |                                                                                                                                                                        |
|----------------------------------------------------------------|---------|-------|------------------------------------------------------------------------------------------------------------------------------------------------------------------------|
|                                                                |         |       | 5770-5781.                                                                                                                                                             |
| MIL-type MOF Fe <sup>IV</sup> =O                               |         | 40.0  | Gagliardi & Coworkers, <i>ACS Catal.</i> <b>2019</b> , <i>9</i> , 2870-2879.                                                                                           |
| [(CB5)Fe <sup>IV</sup> =O(H <sub>2</sub> O)] <sup>2+</sup>     |         | 28.7  | This work                                                                                                                                                              |
| Cpd I                                                          | Methane | 110.8 | Yoshizawa & Coworkers, <i>J. Am. Chem. Soc.</i> <b>2001</b> , <i>123</i> , 9806-9816; Shaik & Coworker, <i>J. Am. Chem. Soc.</i> <b>2000</b> , <i>122</i> , 8977-8989. |
| sMMO                                                           |         | 81.6  | Yoshizawa & Coworkers, <i>Dalton Trans.</i> <b>2013</b> , <i>42</i> , 1011-1023.                                                                                       |
| Fe <sub>0.1</sub> Mg <sub>1.9</sub> (dobdc)Fe <sup>IV</sup> =O |         | 69    | Gagliardi, Truhler & Coworkers, <i>J. Am. Chem. Soc.</i> <b>2015</b> , <i>137</i> , 5770-5781                                                                          |
| MIL-type MOF Fe <sup>IV</sup> =O                               |         | 60    | Gagliardi & Coworkers, <i>ACS Catal.</i> <b>2019</b> , <i>9</i> , 2870-2879                                                                                            |
| [(CB5)Fe <sup>IV</sup> =O(H <sub>2</sub> O)] <sup>2+</sup>     |         | 44.0  | This work                                                                                                                                                              |

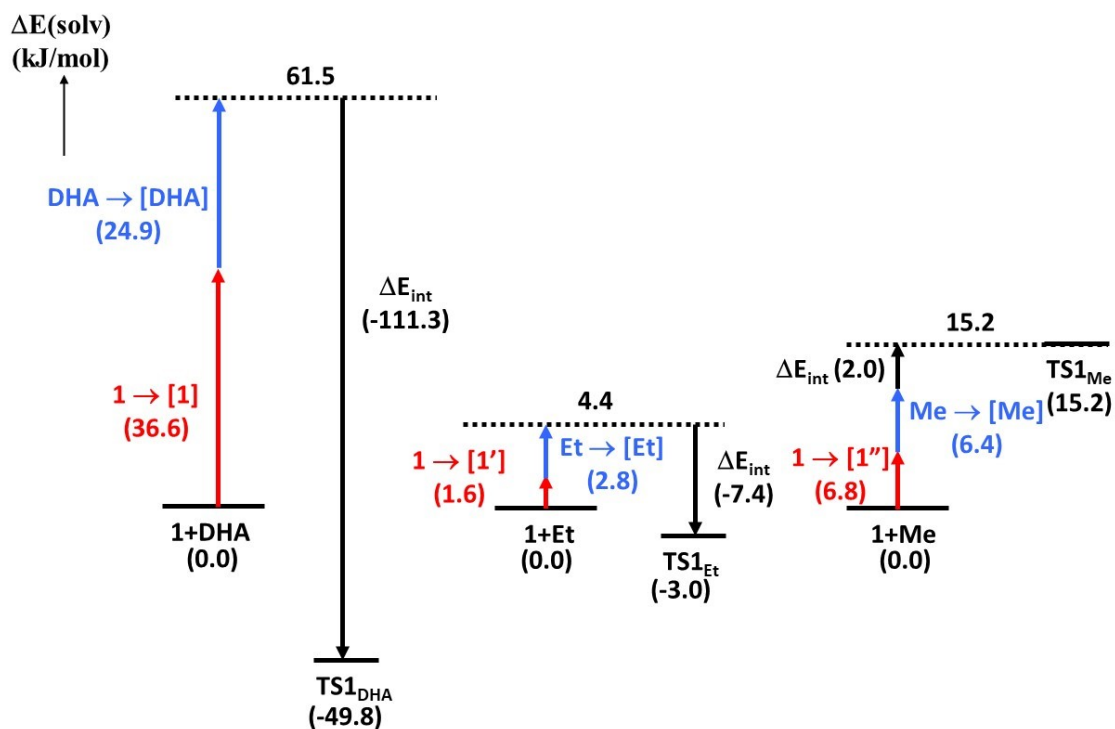

**Figure S4.** Fragment energy decomposition analysis of  $\text{TS1}_{\text{DHA}}$ ,  $\text{TS1}_{\text{Et}}$  and  $\text{TS1}_{\text{Me}}$ .

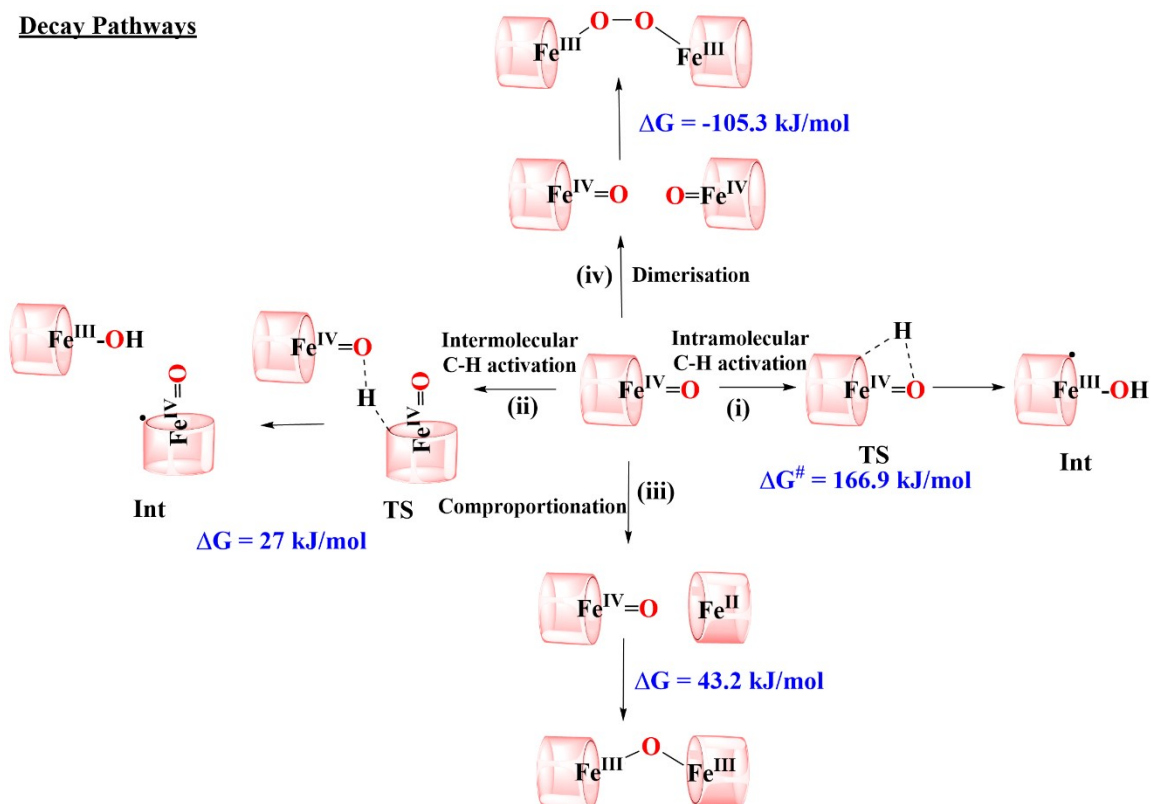

**Figure S5.** Various possible decay pathways. Here,  $\Delta G$  is Gibbs free energy and  $\Delta G^\ddagger$  is activation barrier. These are not the exhausted decomposition pathways but the most important pathways discussed in other papers.

**Table S3.** B3LYP-D3 computed structural parameters; bond lengths (Å) and bond angles (°).

| Spin states                     | Fe-O  | Fe-OH <sub>2</sub> | Fe-O1 | Fe-O2 | Fe-O3 | Fe-O4 | O-H <sub>ts</sub> | H <sub>ts</sub> -C | O-C <sub>ts</sub> | O-Fe-OH <sub>2</sub> | O1-Fe-O3 | O2-Fe-O4 | Fe-O-H           | O-H-C            | Fe-O-C |
|---------------------------------|-------|--------------------|-------|-------|-------|-------|-------------------|--------------------|-------------------|----------------------|----------|----------|------------------|------------------|--------|
| <sup>5</sup> I                  | 1.600 | 2.205              | 2.051 | 2.125 | 2.069 | 2.065 | -                 | -                  | -                 | 177.4                | 167.3    | 166.9    | -                | -                | -      |
| <sup>3</sup> I                  | 1.609 | 2.188              | 2.026 | 1.967 | 1.993 | 2.043 | -                 | -                  | -                 | 175.2                | 174.6    | 174.8    | -                | -                | -      |
| <sup>5</sup> TS1 <sub>DHA</sub> | 1.696 | 2.442              | 2.141 | 2.135 | 2.201 | 2.182 | 1.841<br>(1.856)  | 1.145<br>(1.140)   | -                 | 174.2                | 161.6    | 160.6    | 115.8<br>(131.7) | 149.8<br>(148.7) | -      |
| <sup>3</sup> TS1 <sub>DHA</sub> | 1.610 | 2.200              | 2.176 | 2.198 | 2.151 | 2.263 | 2.005<br>(2.021)  | 1.131<br>(1.124)   | -                 | 174.0                | 168.0    | 165.7    | 108.4<br>(116.5) | 138.0<br>(137.7) | -      |
| <sup>5</sup> P <sub>DHA</sub>   | 2.093 | 2.286              | 2.163 | 2.108 | 2.263 | 2.098 | 0.981<br>(0.977)  | 4.301<br>(3.874)   | -                 | 161.5                | 163.0    | 163.6    | 105.6<br>(120.6) | 109.5<br>(131.4) | -      |
| <sup>3</sup> P <sub>DHA</sub>   | 1.964 | 2.089              | 2.132 | 2.111 | 2.315 | 2.041 | 0.980<br>(0.980)  | 4.030<br>(3.800)   | -                 | 173.7                | 161.6    | 163.1    | 107.9<br>(115.1) | 120.7<br>(133.4) | -      |
| <sup>5</sup> TS1 <sub>Et</sub>  | 1.632 | 2.285              | 2.092 | 2.077 | 2.122 | 2.068 | 1.753             | 1.126              | -                 | 177.0                | 165.7    | 166.5    | 159.7            | 149.9            | -      |
| <sup>3</sup> TS1 <sub>Et</sub>  | 1.694 | 2.188              | 2.121 | 1.986 | 2.038 | 2.051 | 1.246             | 1.299              | -                 | 174.5                | 171.2    | 175.0    | 116.4            | 172.0            | -      |
| <sup>5</sup> P <sub>Et</sub>    | 2.072 | 2.272              | 2.123 | 2.131 | 2.285 | 2.108 | 0.970             | -                  | 1.469             | 175.8                | 162.6    | 162.9    | 112.9            | -                | 125.2  |
| <sup>3</sup> P <sub>Et</sub>    | 1.957 | 2.103              | 2.143 | 2.086 | 2.343 | 2.065 | 0.973             | -                  | 1.477             | 176.3                | 162.8    | 163.0    | 106.4            | -                | 123.1  |
| <sup>5</sup> TS1 <sub>Me</sub>  | 1.658 | 2.317              | 2.104 | 2.070 | 2.119 | 2.092 | 1.569             | 1.114              | -                 | 175.7                | 165.5    | 165.5    | 150.1            | 163.6            | -      |
| <sup>3</sup> TS1 <sub>Me</sub>  | 1.767 | 2.221              | 2.090 | 2.080 | 2.186 | 2.073 | 1.249             | 1.290              | -                 | 178.8                | 165.5    | 166.6    | 119.2            | 176.2            | -      |
| <sup>5</sup> Int1 <sub>Me</sub> | 1.762 | 2.392              | 2.110 | 2.077 | 2.140 | 2.125 | 1.002             | 1.874              | -                 | 175.0                | 162.7    | 163.0    | 129.0            | 170.6            | -      |
| <sup>3</sup> Int1 <sub>Me</sub> | 1.753 | 2.179              | 2.085 | 2.103 | 2.159 | 2.050 | 0.998             | 2.017              | -                 | 178.9                | 166.0    | 166.9    | 111.8            | 163.5            | -      |
| <sup>5</sup> P <sub>Me</sub>    | 2.087 | 2.282              | 2.147 | 2.099 | 2.246 | 2.134 | 0.982             | -                  | 1.443             | 159.8                | 163.9    | 162.9    | 104.0            | -                | 122.3  |

|                              |             |             |              |              |              |              |                         |                         |                         |               |                 |                 |               |              |               |
|------------------------------|-------------|-------------|--------------|--------------|--------------|--------------|-------------------------|-------------------------|-------------------------|---------------|-----------------|-----------------|---------------|--------------|---------------|
| <sup>3</sup> P <sub>Me</sub> | 1.994       | 2.135       | 2.096        | 2.163        | 2.247        | 2.113        | 0.983                   | -                       | 1.447                   | 168.2         | 162.3           | 161.0           | 103.4         | -            | 120.2         |
|                              | <b>Fe-O</b> | <b>Fe-X</b> | <b>Fe-O1</b> | <b>Fe-O2</b> | <b>Fe-O3</b> | <b>Fe-O4</b> | <b>O-H<sub>ts</sub></b> | <b>H<sub>ts</sub>-C</b> | <b>O-C<sub>ts</sub></b> | <b>O-Fe-X</b> | <b>O1-Fe-O3</b> | <b>O2-Fe-O4</b> | <b>Fe-O-H</b> | <b>O-H-C</b> | <b>Fe-O-C</b> |
| <sup>5</sup> 1a              | 1.639       | 2.412       | 2.151        | 2.174        | 2.152        | 2.170        | -                       | -                       | -                       | 176.7         | 162.5           | 162.7           | -             | -            | -             |
| <sup>3</sup> 1a              | 1.736       | 2.362       | 2.133        | 2.206        | 2.166        | 2.168        | -                       | -                       | -                       | 178.2         | 161.3           | 161.6           | -             | -            | -             |
| <sup>5</sup> 1b              | 1.621       | 2.339       | 2.139        | 2.149        | 2.148        | 2.141        | -                       | -                       | -                       | 176.6         | 164.0           | 164.0           | -             | -            | -             |
| <sup>3</sup> 1b              | 1.628       | 2.354       | 2.130        | 1.992        | 1.992        | 2.131        | -                       | -                       | -                       | 173.8         | 172.5           | 172.5           | -             | -            | -             |
| <sup>5</sup> 1c              | 1.628       | 2.027       | 2.155        | 2.144        | 2.145        | 2.155        | -                       | -                       | -                       | 170.1         | 174.4           | 170.1           | -             | -            | -             |
| <sup>3</sup> 1c              | 1.639       | 2.025       | 2.165        | 1.994        | 1.994        | 2.165        | -                       | -                       | -                       | 172.3         | 172.7           | 172.7           | -             | -            | -             |
| <sup>5</sup> 1d              | 1.636       | 1.875       | 2.174        | 2.126        | 2.127        | 2.172        | -                       | -                       | -                       | 179.3         | 169.0           | 169.0           | -             | -            | -             |
| <sup>3</sup> 1d              | 1.675       | 1.804       | 2.247        | 2.165        | 2.166        | 2.247        | -                       | -                       | -                       | 178.4         | 169.1           | 169.1           | -             | -            | -             |
| <sup>5</sup> 1e              | 1.630       | 1.979       | 2.146        | 2.148        | 2.121        | 2.192        | -                       | -                       | -                       | 177.9         | 169.2           | 167.2           | -             | -            | -             |
| <sup>3</sup> 1e              | 1.677       | 1.924       | 2.159        | 2.193        | 2.138        | 2.279        | -                       | -                       | -                       | 178.4         | 169.9           | 166.6           | -             | -            | -             |

**Table S4.** B3LYP-D3 computed spin densities.

| Species                         | Fe    | O      | O1     | O2     | O3     | O4     | OH <sub>2</sub> | C <sub>ts</sub> |
|---------------------------------|-------|--------|--------|--------|--------|--------|-----------------|-----------------|
| <sup>5</sup> 1                  | 3.146 | 0.608  | 0.050  | 0.038  | 0.044  | 0.050  | 0.000           | -               |
| <sup>3</sup> 1                  | 1.061 | 0.986  | -0.007 | -0.012 | -0.010 | -0.006 | -0.002          | -               |
| <sup>5</sup> TS1 <sub>DHA</sub> | 3.977 | 0.544  | 0.028  | 0.027  | 0.022  | 0.026  | 0.003           | -0.700          |
| <sup>3</sup> TS1 <sub>DHA</sub> | 2.675 | 0.063  | 0.005  | 0.003  | 0.003  | 0.003  | -0.002          | -0.792          |
| <sup>5</sup> P <sub>DHA</sub>   | 3.827 | 0.032  | 0.013  | 0.019  | 0.006  | 0.020  | 0.010           | 0.000           |
| <sup>3</sup> P <sub>DHA</sub>   | 1.941 | -0.022 | 0.014  | 0.009  | 0.005  | 0.013  | -0.011          | 0.000           |
| <sup>5</sup> TS1 <sub>Et</sub>  | 3.483 | 0.354  | 0.049  | 0.045  | 0.038  | 0.049  | 0.004           | -0.091          |
| <sup>3</sup> TS1 <sub>Et</sub>  | 2.818 | -0.389 | 0.015  | 0.021  | 0.026  | 0.020  | -0.003          | -0.569          |
| <sup>5</sup> P <sub>Et</sub>    | 3.824 | 0.034  | 0.017  | 0.015  | 0.006  | 0.021  | 0.011           | 0.000           |
| <sup>3</sup> P <sub>Et</sub>    | 1.951 | -0.026 | 0.014  | 0.010  | 0.005  | 0.012  | -0.010          | -0.002          |
| <sup>5</sup> TS1 <sub>Me</sub>  | 3.704 | 0.195  | 0.049  | 0.047  | 0.039  | 0.049  | 0.007           | -0.162          |
| <sup>3</sup> TS1 <sub>Me</sub>  | 0.859 | 0.668  | -0.012 | -0.005 | -0.001 | -0.003 | -0.001          | 0.510           |
| <sup>5</sup> Int1 <sub>Me</sub> | 4.190 | 0.446  | 0.047  | 0.052  | 0.039  | 0.048  | 0.010           | -0.976          |
| <sup>3</sup> Int1 <sub>Me</sub> | 2.906 | -0.111 | 0.041  | 0.020  | 0.030  | 0.021  | -0.001          | -1.044          |
| <sup>5</sup> P <sub>Me</sub>    | 3.821 | 0.036  | 0.014  | 0.020  | 0.006  | 0.018  | 0.010           | 0.000           |
| <sup>3</sup> P <sub>Me</sub>    | 1.945 | -0.025 | -0.010 | 0.014  | 0.009  | 0.006  | 0.011           | 0.000           |
|                                 | Fe    | O      | O1     | O2     | O3     | O4     | X               | C <sub>ts</sub> |
| <sup>5</sup> 1a                 | 3.205 | 0.787  | 0.019  | 0.019  | 0.020  | 0.018  | -0.121          | -               |
| <sup>3</sup> 1a                 | 0.973 | 1.080  | -0.009 | -0.011 | -0.012 | -0.010 | 0.003           | -               |
| <sup>5</sup> 1b                 | 3.154 | 0.680  | 0.029  | 0.029  | 0.029  | 0.029  | 0.002           | -               |
| <sup>3</sup> 1b                 | 1.096 | 0.955  | -0.007 | -0.017 | -0.017 | -0.007 | 0.015           | -               |
| <sup>5</sup> 1c                 | 3.081 | 0.809  | 0.026  | 0.028  | 0.028  | 0.026  | -0.095          | -               |
| <sup>3</sup> 1c                 | 1.041 | 1.029  | -0.004 | -0.017 | -0.017 | -0.004 | -0.065          | -               |
| <sup>5</sup> 1d                 | 3.134 | 0.699  | 0.021  | 0.028  | 0.028  | 0.021  | 0.020           | -               |

|                             |       |        |        |        |        |        |        |   |
|-----------------------------|-------|--------|--------|--------|--------|--------|--------|---|
| <sup>3</sup> I <sub>d</sub> | 2.664 | -0.769 | -0.002 | 0.001  | 0.001  | -0.002 | 0.070  | - |
| <sup>5</sup> I <sub>e</sub> | 3.150 | 0.723  | 0.024  | 0.030  | 0.027  | 0.023  | -0.028 | - |
| <sup>3</sup> I <sub>e</sub> | 1.024 | 0.989  | -0.006 | -0.018 | -0.013 | 0.001  | 0.013  | - |

**Table S4.** The comparative Gibbs free energies ( $\Delta G$ , kJ/mol) of acetonitrile and water as a solvent.

| Species                         | $\Delta G$ (Acetonitrile) (kJ/mol) | $\Delta G$ (Water) (kJ/mol) |
|---------------------------------|------------------------------------|-----------------------------|
| <sup>5</sup> I                  | 0.0                                | 0.0                         |
| <sup>3</sup> I                  | 87.2                               | 87.5                        |
| <sup>5</sup> TSI <sub>DHA</sub> | 2.2                                | 2.4                         |
| <sup>5</sup> P <sub>DHA</sub>   | -359.7                             | -357.3                      |
| <sup>5</sup> TSI <sub>Et</sub>  | 28.7                               | 29.3                        |
| <sup>5</sup> P <sub>Et</sub>    | -281.0                             | -279.8                      |
| <sup>5</sup> TSI <sub>Me</sub>  | 44.0                               | 44.5                        |
| <sup>5</sup> IntI <sub>Me</sub> | -11.5                              | -10.8                       |
| <sup>5</sup> P <sub>Me</sub>    | -257.3                             | -256.1                      |

**Optimized geometries Cartesian coordinates:**

<sup>5</sup>R

```

Fe  0.050769000  -0.435628000  -2.481890000
C   -0.053044000  3.694717000  -1.791948000
N    1.053578000  4.004242000  -1.006502000
C    0.705105000  4.336912000  0.366928000
C   -0.869133000  4.307845000  0.353037000
N   -1.182108000  3.966653000  -1.026594000
N   -1.190750000  3.255272000  1.286539000
C   -0.060626000  2.518157000  1.622226000
N    1.047335000  3.299062000  1.309334000
C    2.304014000  3.234234000  2.042375000
N    3.219094000  2.225961000  1.575595000
C    3.398413000  1.048785000  2.299027000
N    4.109722000  0.170789000  1.468378000
C    4.309266000  0.712224000  0.151349000
C    3.787493000  2.185688000  0.256179000

```

|   |              |              |              |
|---|--------------|--------------|--------------|
| N | 2.805963000  | 2.283845000  | -0.827451000 |
| C | 2.539511000  | 1.063850000  | -1.359821000 |
| N | 3.434976000  | 0.147409000  | -0.878115000 |
| C | 4.271947000  | -1.216445000 | 1.842964000  |
| N | 3.207829000  | -2.112563000 | 1.380542000  |
| C | 2.019619000  | -2.244075000 | 2.090966000  |
| N | 1.158708000  | -3.079278000 | 1.316141000  |
| C | 1.934864000  | -3.787750000 | 0.305756000  |
| C | 3.243844000  | -2.931200000 | 0.200727000  |
| N | 1.350400000  | -3.684327000 | -1.025214000 |
| C | 1.883354000  | -2.611005000 | -1.683669000 |
| N | 3.022701000  | -2.224912000 | -1.068304000 |
| C | 0.040321000  | -3.735946000 | 2.016258000  |
| N | -1.248953000 | -3.378436000 | 1.488566000  |
| C | -2.011729000 | -2.367021000 | 2.088582000  |
| N | -3.151714000 | -2.195860000 | 1.302797000  |
| C | -3.159198000 | -3.047297000 | 0.146189000  |
| C | -1.843242000 | -3.905902000 | 0.292993000  |
| N | -2.929709000 | -2.351172000 | -1.129376000 |
| C | -1.712245000 | -2.614673000 | -1.647501000 |
| N | -1.098335000 | -3.595197000 | -0.935450000 |
| C | -4.264740000 | -1.360435000 | 1.755241000  |
| N | -4.173187000 | 0.037936000  | 1.395469000  |
| C | -3.502782000 | 0.936046000  | 2.237851000  |
| N | -3.332643000 | 2.113696000  | 1.511108000  |
| C | -3.877643000 | 2.054591000  | 0.181727000  |
| C | -4.334179000 | 0.561477000  | 0.067356000  |
| N | -2.883977000 | 2.192321000  | -0.883076000 |
| C | -2.529649000 | 0.979944000  | -1.384032000 |
| N | -3.393680000 | 0.021476000  | -0.920101000 |
| C | 3.757006000  | -1.086355000 | -1.560673000 |
| C | 0.088691000  | -4.278016000 | -1.423293000 |
| C | -3.670294000 | -1.214787000 | -1.624096000 |
| O | 1.741674000  | -1.751364000 | 3.151437000  |
| O | -1.734337000 | -1.786126000 | 3.107085000  |
| O | -3.180070000 | 0.748562000  | 3.383795000  |
| O | 1.408371000  | -2.056601000 | -2.694137000 |
| O | 1.636162000  | 0.833955000  | -2.195260000 |
| O | -1.244835000 | -2.039454000 | -2.655488000 |
| O | -1.576372000 | 0.796977000  | -2.172758000 |
| C | -2.459211000 | 3.147574000  | 1.996806000  |
| C | 2.351547000  | 3.559514000  | -1.415509000 |
| C | -2.459542000 | 3.482272000  | -1.458359000 |
| O | 3.051004000  | 0.843876000  | 3.434866000  |
| O | -0.041857000 | 1.385498000  | 2.082972000  |
| O | -0.034945000 | 3.291308000  | -2.934761000 |
| O | 0.041807000  | -0.188839000 | -4.062254000 |
| O | 0.035260000  | -0.678948000 | -0.290447000 |
| H | 0.282858000  | -1.478829000 | 0.224026000  |
| H | -0.028152000 | 0.047117000  | 0.369449000  |



|   |              |              |              |
|---|--------------|--------------|--------------|
| H | 0.066685000  | -3.394434000 | 3.054156000  |
| H | 0.172282000  | -4.823715000 | 1.979284000  |
| H | -5.194056000 | -1.784603000 | 1.362409000  |
| H | -4.280380000 | -1.392499000 | 2.846586000  |
| H | 4.269873000  | -1.242273000 | 2.934616000  |
| H | 5.226070000  | -1.598584000 | 1.468384000  |
| H | 4.163883000  | -3.521065000 | 0.143741000  |
| H | 2.111554000  | -4.834273000 | 0.574165000  |
| H | -2.018940000 | -4.985032000 | 0.354161000  |
| H | -4.074841000 | -3.642812000 | 0.080369000  |
| H | -5.360373000 | 0.437386000  | -0.295164000 |
| H | 0.065451000  | -5.311951000 | -1.070497000 |
| H | 0.058619000  | -4.267066000 | -2.513938000 |
| H | -3.412314000 | -1.099634000 | -2.677927000 |
| H | -4.740213000 | -1.423810000 | -1.538767000 |
| H | 3.522969000  | -0.987595000 | -2.622019000 |
| H | 4.829095000  | -1.270740000 | -1.445022000 |
| H | 2.109627000  | 2.995128000  | 3.090509000  |
| H | 2.762482000  | 4.227291000  | 1.980913000  |
| H | -2.945205000 | 4.127349000  | 1.931172000  |
| H | -2.275530000 | 2.909938000  | 3.047250000  |
| H | 5.354552000  | 0.631284000  | -0.165919000 |
| H | 4.564001000  | 2.945506000  | 0.117801000  |
| H | 1.130913000  | 5.301534000  | 0.658871000  |
| H | -1.334940000 | 5.255434000  | 0.639638000  |
| H | -4.682490000 | 2.781981000  | 0.031451000  |
| H | 3.112136000  | 4.301222000  | -1.154521000 |
| H | 2.313174000  | 3.444206000  | -2.500253000 |
| H | -2.400284000 | 3.373937000  | -2.542864000 |
| H | -3.246548000 | 4.199217000  | -1.207124000 |

### <sup>3</sup>R

|    |              |              |              |
|----|--------------|--------------|--------------|
| Fe | -0.153943000 | -0.530796000 | -2.415495000 |
| C  | 0.868631000  | 3.648098000  | -1.819963000 |
| N  | 2.026994000  | 3.642221000  | -1.049582000 |
| C  | 1.802424000  | 4.048592000  | 0.329476000  |
| C  | 0.271065000  | 4.414949000  | 0.347889000  |
| N  | -0.141000000 | 4.189587000  | -1.028628000 |
| N  | -0.286685000 | 3.462562000  | 1.279179000  |
| C  | 0.637414000  | 2.477764000  | 1.614637000  |
| N  | 1.894904000  | 2.961126000  | 1.273375000  |
| C  | 3.112161000  | 2.575668000  | 1.973877000  |
| N  | 3.714611000  | 1.358959000  | 1.498279000  |
| C  | 3.601243000  | 0.179874000  | 2.233875000  |
| N  | 4.031901000  | -0.857177000 | 1.393972000  |
| C  | 4.297088000  | -0.395833000 | 0.060152000  |
| C  | 4.202274000  | 1.159601000  | 0.159327000  |
| N  | 3.246434000  | 1.511197000  | -0.889215000 |
| C  | 2.592522000  | 0.410534000  | -1.355090000 |

|   |              |              |              |
|---|--------------|--------------|--------------|
| N | 3.245815000  | -0.717101000 | -0.909796000 |
| C | 3.823901000  | -2.236760000 | 1.769524000  |
| N | 2.566054000  | -2.830556000 | 1.309726000  |
| C | 1.403654000  | -2.741249000 | 2.075026000  |
| N | 0.456224000  | -3.592978000 | 1.485289000  |
| C | 0.937999000  | -4.237097000 | 0.296614000  |
| C | 2.407334000  | -3.672841000 | 0.158968000  |
| N | 0.286814000  | -3.776523000 | -0.941386000 |
| C | 1.094631000  | -2.936940000 | -1.632376000 |
| N | 2.336953000  | -2.948686000 | -1.123536000 |
| C | -0.883507000 | -3.673333000 | 2.007570000  |
| N | -1.833027000 | -2.781496000 | 1.318043000  |
| C | -2.488277000 | -1.772202000 | 2.088958000  |
| N | -3.592252000 | -1.352806000 | 1.353399000  |
| C | -3.807939000 | -2.142628000 | 0.173694000  |
| C | -2.732125000 | -3.280214000 | 0.287280000  |
| N | -3.418048000 | -1.506360000 | -1.095131000 |
| C | -2.377486000 | -2.124453000 | -1.678596000 |
| N | -2.108798000 | -3.293682000 | -1.033251000 |
| C | -4.431209000 | -0.237608000 | 1.810655000  |
| N | -3.962080000 | 1.078011000  | 1.441108000  |
| C | -3.071636000 | 1.773704000  | 2.273671000  |
| N | -2.635212000 | 2.881867000  | 1.552227000  |
| C | -3.190137000 | 2.965125000  | 0.226161000  |
| C | -4.001636000 | 1.634711000  | 0.115619000  |
| N | -2.203018000 | 2.858030000  | -0.847991000 |
| C | -2.140774000 | 1.588302000  | -1.336957000 |
| N | -3.230921000 | 0.883750000  | -0.875817000 |
| C | 3.283497000  | -1.975306000 | -1.619710000 |
| C | -1.022043000 | -4.166402000 | -1.431906000 |
| C | -3.833075000 | -0.214461000 | -1.589171000 |
| O | 1.235740000  | -2.086870000 | 3.072490000  |
| O | -2.124399000 | -1.370499000 | 3.160972000  |
| O | -2.779183000 | 1.490577000  | 3.408569000  |
| O | 0.766498000  | -2.255300000 | -2.637205000 |
| O | 1.574393000  | 0.470821000  | -2.078737000 |
| O | -1.768543000 | -1.670140000 | -2.677104000 |
| O | -1.240508000 | 1.169201000  | -2.093749000 |
| C | -1.522308000 | 3.666431000  | 2.020889000  |
| C | 3.143691000  | 2.857998000  | -1.480563000 |
| C | -1.502984000 | 4.017808000  | -1.432369000 |
| O | 3.252118000  | 0.079584000  | 3.383061000  |
| O | 0.385889000  | 1.386473000  | 2.103916000  |
| O | 0.764885000  | 3.281642000  | -2.969619000 |
| O | -0.078394000 | -0.236069000 | -3.995719000 |
| O | -0.171851000 | -0.769937000 | -0.240455000 |
| H | -0.624898000 | -1.453311000 | 0.300712000  |
| H | 0.042496000  | -0.038255000 | 0.377473000  |
| H | -0.842260000 | -3.351637000 | 3.051282000  |
| H | -1.243527000 | -4.707105000 | 1.951755000  |

|   |              |              |              |
|---|--------------|--------------|--------------|
| H | -5.443329000 | -0.396022000 | 1.426961000  |
| H | -4.442993000 | -0.265989000 | 2.902140000  |
| H | 3.818890000  | -2.256562000 | 2.861270000  |
| H | 4.647018000  | -2.853403000 | 1.394630000  |
| H | 3.179063000  | -4.446012000 | 0.101795000  |
| H | 0.881556000  | -5.328725000 | 0.356732000  |
| H | -3.148501000 | -4.262685000 | 0.531353000  |
| H | -4.838808000 | -2.503005000 | 0.105591000  |
| H | -5.030167000 | 1.769152000  | -0.236332000 |
| H | -1.241765000 | -5.177309000 | -1.080492000 |
| H | -0.988262000 | -4.162161000 | -2.522631000 |
| H | -3.555599000 | -0.173372000 | -2.643690000 |
| H | -4.920260000 | -0.131819000 | -1.502316000 |
| H | 3.053674000  | -1.817082000 | -2.674367000 |
| H | 4.291987000  | -2.388510000 | -1.533999000 |
| H | 2.892880000  | 2.404545000  | 3.030385000  |
| H | 3.812162000  | 3.413745000  | 1.885203000  |
| H | -1.757921000 | 4.735218000  | 1.969779000  |
| H | -1.378987000 | 3.382024000  | 3.065921000  |
| H | 5.262372000  | -0.757571000 | -0.310336000 |
| H | 5.150474000  | 1.678740000  | -0.015533000 |
| H | 2.461489000  | 4.876494000  | 0.607949000  |
| H | 0.064159000  | 5.444367000  | 0.656215000  |
| H | -3.790588000 | 3.870154000  | 0.087268000  |
| H | 4.085213000  | 3.362270000  | -1.243726000 |
| H | 3.049938000  | 2.756561000  | -2.563355000 |
| H | -1.493383000 | 3.906849000  | -2.518193000 |
| H | -2.098770000 | 4.894635000  | -1.162753000 |

**<sup>5</sup>TS1<sub>DHA</sub>**

|    |              |              |              |
|----|--------------|--------------|--------------|
| Fe | 1.198328000  | -0.629699000 | -1.176351000 |
| C  | 1.123769000  | -1.851250000 | 2.884894000  |
| N  | 0.024469000  | -2.681949000 | 3.035184000  |
| C  | -1.006381000 | -2.124859000 | 3.901951000  |
| C  | -0.391411000 | -0.745798000 | 4.341810000  |
| N  | 0.918338000  | -0.750443000 | 3.708777000  |
| N  | -1.309984000 | 0.222152000  | 3.794572000  |
| C  | -2.291026000 | -0.375946000 | 3.004629000  |
| N  | -2.217471000 | -1.749292000 | 3.219790000  |
| C  | -3.355311000 | -2.630961000 | 2.994177000  |
| N  | -3.473382000 | -3.131913000 | 1.650252000  |
| C  | -4.413502000 | -2.593598000 | 0.770411000  |
| N  | -4.102580000 | -3.091266000 | -0.500848000 |
| C  | -2.905025000 | -3.885735000 | -0.504118000 |
| C  | -2.515846000 | -3.993727000 | 1.010838000  |
| N  | -1.138514000 | -3.511016000 | 1.043231000  |
| C  | -0.758792000 | -2.982528000 | -0.157206000 |

|   |              |              |              |
|---|--------------|--------------|--------------|
| N | -1.733163000 | -3.236805000 | -1.089827000 |
| C | -4.741331000 | -2.548612000 | -1.678038000 |
| N | -4.037336000 | -1.435535000 | -2.307804000 |
| C | -4.300543000 | -0.118392000 | -1.935884000 |
| N | -3.654791000 | 0.705900000  | -2.864923000 |
| C | -2.929665000 | -0.024779000 | -3.867834000 |
| C | -3.179689000 | -1.527022000 | -3.458008000 |
| N | -1.472281000 | 0.106781000  | -3.791881000 |
| C | -0.888291000 | -1.026983000 | -3.306989000 |
| N | -1.820799000 | -2.005515000 | -3.186565000 |
| C | -3.661203000 | 2.135433000  | -2.706216000 |
| N | -2.464086000 | 2.650795000  | -2.029003000 |
| C | -2.640238000 | 3.338963000  | -0.797144000 |
| N | -1.477488000 | 4.067169000  | -0.567616000 |
| C | -0.561332000 | 4.012805000  | -1.674184000 |
| C | -1.356597000 | 3.230485000  | -2.774757000 |
| N | 0.612339000  | 3.156287000  | -1.495759000 |
| C | 0.640171000  | 2.114289000  | -2.365842000 |
| N | -0.398787000 | 2.245856000  | -3.252993000 |
| C | -1.299288000 | 4.841298000  | 0.660848000  |
| N | -0.769619000 | 4.100635000  | 1.784385000  |
| C | -1.640071000 | 3.422107000  | 2.651309000  |
| N | -0.850722000 | 2.589156000  | 3.440020000  |
| C | 0.556841000  | 2.694197000  | 3.157873000  |
| C | 0.587312000  | 3.635877000  | 1.906468000  |
| N | 1.176348000  | 1.465579000  | 2.675626000  |
| C | 1.313884000  | 1.473320000  | 1.315664000  |
| N | 1.031322000  | 2.733182000  | 0.847471000  |
| C | -1.477534000 | -3.236664000 | -2.516438000 |
| C | -0.685325000 | 1.236719000  | -4.253792000 |
| C | 1.556215000  | 3.219985000  | -0.409845000 |
| O | -4.980608000 | 0.254263000  | -1.012081000 |
| O | -3.618769000 | 3.286321000  | -0.098764000 |
| O | -2.834408000 | 3.568897000  | 2.731529000  |
| O | 0.317950000  | -1.166073000 | -3.045536000 |
| O | 0.319715000  | -2.404295000 | -0.361245000 |
| O | 1.484289000  | 1.206456000  | -2.355540000 |
| O | 1.667527000  | 0.505788000  | 0.627062000  |
| C | -1.449712000 | 1.586689000  | 4.283371000  |
| C | -0.192718000 | -3.775787000 | 2.130929000  |
| C | 1.727274000  | 0.421764000  | 3.543432000  |
| O | -5.343913000 | -1.883648000 | 1.060152000  |
| O | -3.068666000 | 0.199732000  | 2.268145000  |
| O | 2.106294000  | -2.062227000 | 2.198933000  |
| O | 2.766533000  | -1.244251000 | -1.373847000 |
| O | -1.026918000 | 0.225736000  | -0.649491000 |
| H | -1.548325000 | 0.897291000  | -1.133117000 |
| H | -1.484284000 | 0.123552000  | 0.205318000  |
| H | -4.519110000 | 2.384148000  | -2.076505000 |
| H | -3.765445000 | 2.617551000  | -3.685755000 |

|   |              |              |              |
|---|--------------|--------------|--------------|
| H | -0.649487000 | 5.692837000  | 0.436913000  |
| H | -2.283891000 | 5.199621000  | 0.968173000  |
| H | -5.717554000 | -2.183130000 | -1.352468000 |
| H | -4.873872000 | -3.338565000 | -2.424769000 |
| H | -3.631437000 | -2.132177000 | -4.250973000 |
| H | -3.269681000 | 0.221073000  | -4.879925000 |
| H | -1.705055000 | 3.862361000  | -3.599215000 |
| H | -0.247200000 | 5.016325000  | -1.980645000 |
| H | 1.289675000  | 4.472118000  | 1.999552000  |
| H | -1.213302000 | 1.713246000  | -5.084230000 |
| H | 0.274104000  | 0.853222000  | -4.604377000 |
| H | 2.419716000  | 2.619645000  | -0.696974000 |
| H | 1.879160000  | 4.255985000  | -0.267375000 |
| H | -0.412373000 | -3.402062000 | -2.687172000 |
| H | -2.046571000 | -4.057081000 | -2.963923000 |
| H | -4.279434000 | -2.081580000 | 3.187670000  |
| H | -3.270496000 | -3.460007000 | 3.705847000  |
| H | -1.012787000 | 1.621805000  | 5.288226000  |
| H | -2.509959000 | 1.843796000  | 4.340847000  |
| H | -3.069118000 | -4.855452000 | -0.988200000 |
| H | -2.558693000 | -5.014368000 | 1.407846000  |
| H | -1.213384000 | -2.803200000 | 4.736337000  |
| H | -0.293035000 | -0.632443000 | 5.426793000  |
| H | 1.116980000  | 3.078858000  | 4.017866000  |
| H | -0.574423000 | -4.646676000 | 2.673184000  |
| H | 0.779829000  | -4.014977000 | 1.696750000  |
| H | 2.669183000  | 0.080812000  | 3.114587000  |
| H | 1.917250000  | 0.891590000  | 4.513492000  |
| H | 3.820968000  | -1.248915000 | 0.134704000  |
| C | 4.805855000  | -0.981133000 | 0.654230000  |
| C | 5.793431000  | -1.770186000 | -0.121468000 |
| C | 4.900019000  | 0.499332000  | 0.466987000  |
| H | 4.699448000  | -1.298937000 | 1.693258000  |
| C | 6.092374000  | -1.301714000 | -1.443785000 |
| C | 6.362233000  | -2.964734000 | 0.340714000  |
| C | 5.169561000  | 0.958814000  | -0.842193000 |
| C | 4.704080000  | 1.423362000  | 1.498353000  |
| C | 5.364004000  | -0.086809000 | -1.897258000 |
| C | 6.959069000  | -2.034522000 | -2.262015000 |
| C | 7.239709000  | -3.666051000 | -0.472798000 |
| H | 6.126850000  | -3.321811000 | 1.338832000  |
| C | 5.216081000  | 2.332097000  | -1.103327000 |
| C | 4.773681000  | 2.790628000  | 1.237531000  |
| H | 4.541550000  | 1.067489000  | 2.511873000  |
| H | 5.731567000  | 0.311769000  | -2.846582000 |
| H | 4.311348000  | -0.487274000 | -2.071212000 |
| C | 7.540048000  | -3.199089000 | -1.777659000 |
| H | 7.183789000  | -1.682050000 | -3.264281000 |
| H | 7.707740000  | -4.576698000 | -0.111768000 |
| C | 5.028630000  | 3.245942000  | -0.066435000 |

|   |             |              |              |
|---|-------------|--------------|--------------|
| H | 5.431618000 | 2.681772000  | -2.109406000 |
| H | 4.665028000 | 3.505071000  | 2.049110000  |
| H | 8.233166000 | -3.758995000 | -2.397993000 |
| H | 5.108068000 | 4.311376000  | -0.263416000 |

**Imaginary Frequency:  $i340\text{ cm}^{-1}$**

**<sup>3</sup>TS1<sub>DHA</sub>**

|    |              |              |              |
|----|--------------|--------------|--------------|
| Fe | 1.129924000  | -1.039336000 | -0.988817000 |
| C  | 0.868175000  | -1.219580000 | 3.292145000  |
| N  | -0.323186000 | -1.876922000 | 3.553947000  |
| C  | -1.307416000 | -1.047675000 | 4.231869000  |
| C  | -0.569687000 | 0.330618000  | 4.376916000  |
| N  | 0.737298000  | 0.066153000  | 3.800511000  |
| N  | -1.401606000 | 1.243922000  | 3.629368000  |
| C  | -2.529042000 | 0.620730000  | 3.090590000  |
| N  | -2.481259000 | -0.724208000 | 3.459373000  |
| C  | -3.659402000 | -1.570115000 | 3.354538000  |
| N  | -3.727930000 | -2.337869000 | 2.133602000  |
| C  | -4.626988000 | -2.010470000 | 1.121898000  |
| N  | -4.335049000 | -2.853894000 | 0.034910000  |
| C  | -3.189916000 | -3.686475000 | 0.287421000  |
| C  | -2.877923000 | -3.454158000 | 1.804768000  |
| N  | -1.451320000 | -3.163587000 | 1.810948000  |
| C  | -0.975659000 | -2.922658000 | 0.553211000  |
| N  | -1.951524000 | -3.253575000 | -0.362361000 |
| C  | -4.864009000 | -2.558767000 | -1.276653000 |
| N  | -4.030389000 | -1.677651000 | -2.101612000 |
| C  | -4.095155000 | -0.298798000 | -1.960342000 |
| N  | -3.115774000 | 0.259681000  | -2.834388000 |
| C  | -2.699048000 | -0.737549000 | -3.813939000 |
| C  | -3.119173000 | -2.086770000 | -3.137897000 |
| N  | -1.255802000 | -0.847573000 | -3.939765000 |
| C  | -0.778905000 | -1.844389000 | -3.119845000 |
| N  | -1.824122000 | -2.601627000 | -2.689707000 |
| C  | -3.284438000 | 1.668878000  | -3.222152000 |
| N  | -2.171682000 | 2.492760000  | -2.843424000 |
| C  | -2.215986000 | 3.247064000  | -1.665623000 |
| N  | -0.973960000 | 3.861195000  | -1.526418000 |
| C  | -0.059549000 | 3.496948000  | -2.576001000 |
| C  | -0.910947000 | 2.572722000  | -3.528103000 |
| N  | 1.031241000  | 2.605385000  | -2.173128000 |
| C  | 0.922368000  | 1.362181000  | -2.709759000 |
| N  | -0.145535000 | 1.322457000  | -3.564085000 |
| C  | -0.768712000 | 4.918012000  | -0.534807000 |
| N  | -0.347462000 | 4.466851000  | 0.772631000  |
| C  | -1.307815000 | 4.094820000  | 1.730520000  |
| N  | -0.635098000 | 3.361956000  | 2.706526000  |
| C  | 0.787697000  | 3.292184000  | 2.484928000  |

|   |              |              |              |
|---|--------------|--------------|--------------|
| C | 0.937646000  | 3.885443000  | 1.045800000  |
| N | 1.320618000  | 1.947217000  | 2.345301000  |
| C | 1.440317000  | 1.584768000  | 1.030975000  |
| N | 1.267593000  | 2.704042000  | 0.245227000  |
| C | -1.619922000 | -3.646565000 | -1.718031000 |
| C | -0.383567000 | 0.194945000  | -4.454183000 |
| C | 1.911152000  | 2.822041000  | -1.050130000 |
| O | -4.822332000 | 0.330637000  | -1.236759000 |
| O | -3.169810000 | 3.358290000  | -0.935296000 |
| O | -2.475634000 | 4.393330000  | 1.730380000  |
| O | 0.405213000  | -2.026431000 | -2.814221000 |
| O | 0.158780000  | -2.502717000 | 0.295089000  |
| O | 1.692706000  | 0.418215000  | -2.467455000 |
| O | 1.682024000  | 0.439737000  | 0.631836000  |
| C | -1.348763000 | 2.693170000  | 3.767618000  |
| C | -0.595180000 | -3.169321000 | 2.996715000  |
| C | 1.690676000  | 1.079011000  | 3.460434000  |
| O | -5.512636000 | -1.194377000 | 1.177837000  |
| O | -3.397234000 | 1.152837000  | 2.435541000  |
| O | 1.859423000  | -1.689003000 | 2.765080000  |
| O | 2.555927000  | -1.784275000 | -0.936496000 |
| O | -0.780484000 | 0.040955000  | -0.840657000 |
| H | -1.508982000 | 0.198306000  | -1.482167000 |
| H | -1.148599000 | 0.188142000  | 0.046156000  |
| H | -4.160172000 | 2.048661000  | -2.689923000 |
| H | -3.449020000 | 1.733782000  | -4.304513000 |
| H | -0.033301000 | 5.622618000  | -0.936095000 |
| H | -1.723342000 | 5.427038000  | -0.386820000 |
| H | -5.818269000 | -2.053213000 | -1.115347000 |
| H | -5.026751000 | -3.486425000 | -1.833308000 |
| H | -3.589999000 | -2.800360000 | -3.822185000 |
| H | -3.166550000 | -0.571269000 | -4.790483000 |
| H | -1.021661000 | 2.965345000  | -4.545128000 |
| H | 0.351382000  | 4.381686000  | -3.073598000 |
| H | 1.740814000  | 4.626459000  | 0.958398000  |
| H | -0.809308000 | 0.572836000  | -5.387527000 |
| H | 0.580516000  | -0.274636000 | -4.654222000 |
| H | 2.706748000  | 2.081665000  | -1.125240000 |
| H | 2.351836000  | 3.820624000  | -1.124124000 |
| H | -0.563605000 | -3.918765000 | -1.767704000 |
| H | -2.231149000 | -4.515358000 | -1.983981000 |
| H | -4.547767000 | -0.934210000 | 3.359781000  |
| H | -3.678975000 | -2.237338000 | 4.224322000  |
| H | -0.894662000 | 2.926012000  | 4.738407000  |
| H | -2.368002000 | 3.085725000  | 3.736778000  |
| H | -3.394783000 | -4.733630000 | 0.036214000  |
| H | -3.083580000 | -4.323514000 | 2.439880000  |
| H | -1.582877000 | -1.499304000 | 5.192293000  |
| H | -0.462986000 | 0.660523000  | 5.417178000  |
| H | 1.347706000  | 3.838296000  | 3.252938000  |

|   |              |              |              |
|---|--------------|--------------|--------------|
| H | -1.084657000 | -3.811061000 | 3.736507000  |
| H | 0.369927000  | -3.599857000 | 2.723225000  |
| H | 2.610262000  | 0.555398000  | 3.199017000  |
| H | 1.877243000  | 1.732545000  | 4.318610000  |
| H | 3.512464000  | -1.203054000 | 0.726619000  |
| C | 4.572932000  | -0.990096000 | 1.055744000  |
| C | 5.331151000  | -2.070523000 | 0.380967000  |
| C | 4.856893000  | 0.398955000  | 0.578107000  |
| H | 4.559185000  | -1.088423000 | 2.144082000  |
| C | 5.650591000  | -1.890206000 | -1.010433000 |
| C | 5.670654000  | -3.270837000 | 1.025703000  |
| C | 5.163455000  | 0.577894000  | -0.789515000 |
| C | 4.796727000  | 1.513223000  | 1.423444000  |
| C | 5.175237000  | -0.639286000 | -1.666039000 |
| C | 6.313664000  | -2.906157000 | -1.705284000 |
| C | 6.343084000  | -4.258451000 | 0.327063000  |
| H | 5.417198000  | -3.406193000 | 2.072698000  |
| C | 5.405509000  | 1.863142000  | -1.286073000 |
| C | 5.043398000  | 2.790311000  | 0.924282000  |
| H | 4.595596000  | 1.371700000  | 2.481687000  |
| H | 5.654671000  | -0.463242000 | -2.633579000 |
| H | 4.092029000  | -0.860568000 | -1.869232000 |
| C | 6.668063000  | -4.074938000 | -1.044662000 |
| H | 6.558885000  | -2.771756000 | -2.754484000 |
| H | 6.633032000  | -5.178885000 | 0.824269000  |
| C | 5.351916000  | 2.965863000  | -0.434102000 |
| H | 5.658162000  | 1.994853000  | -2.334887000 |
| H | 5.030879000  | 3.646579000  | 1.592769000  |
| H | 7.201296000  | -4.858231000 | -1.574658000 |
| H | 5.573596000  | 3.957818000  | -0.817129000 |

**Imaginary Frequency:** $i260\text{ cm}^{-1}$

**$^{51}\text{P}_{\text{DHA}}$**

|    |              |              |              |
|----|--------------|--------------|--------------|
| Fe | 0.141947000  | -0.291206000 | -1.925112000 |
| C  | 0.910645000  | -3.380233000 | 0.534783000  |
| N  | -0.289496000 | -3.947277000 | 0.931083000  |
| C  | -0.612310000 | -3.684157000 | 2.328480000  |
| C  | 0.662587000  | -2.931470000 | 2.852948000  |
| N  | 1.510843000  | -2.862702000 | 1.670137000  |
| N  | 0.150654000  | -1.653077000 | 3.275551000  |
| C  | -1.172257000 | -1.473400000 | 2.879167000  |
| N  | -1.669217000 | -2.721587000 | 2.507860000  |
| C  | -3.082947000 | -3.062336000 | 2.628178000  |
| N  | -3.870200000 | -2.791182000 | 1.455529000  |
| C  | -4.710454000 | -1.677485000 | 1.410450000  |
| N  | -5.114774000 | -1.531417000 | 0.077611000  |
| C  | -4.461253000 | -2.467457000 | -0.796604000 |
| C  | -3.689567000 | -3.428470000 | 0.177771000  |



|   |              |              |              |
|---|--------------|--------------|--------------|
| N | -2.321123000 | -3.398055000 | -0.330547000 |
| C | -2.155536000 | -2.416618000 | -1.261250000 |
| N | -3.379428000 | -1.903242000 | -1.603757000 |
| C | -5.784179000 | -0.322346000 | -0.352163000 |
| N | -4.902820000 | 0.756920000  | -0.792820000 |
| C | -4.455682000 | 1.727484000  | 0.103915000  |
| N | -3.843161000 | 2.734064000  | -0.652097000 |
| C | -3.848148000 | 2.469755000  | -2.064142000 |
| C | -4.581165000 | 1.076234000  | -2.158460000 |
| N | -2.528118000 | 2.194934000  | -2.641285000 |
| C | -2.373506000 | 0.872989000  | -2.931547000 |
| N | -3.553618000 | 0.225556000  | -2.766844000 |
| C | -3.164765000 | 3.823529000  | -0.003292000 |
| N | -1.715477000 | 3.608633000  | 0.134512000  |
| C | -1.171557000 | 3.582227000  | 1.452785000  |
| N | 0.192814000  | 3.816185000  | 1.335187000  |
| C | 0.586332000  | 4.155135000  | -0.007458000 |
| C | -0.771825000 | 4.235168000  | -0.782887000 |
| N | 1.289624000  | 3.111287000  | -0.751053000 |
| C | 0.597404000  | 2.673161000  | -1.837737000 |
| N | -0.526163000 | 3.453472000  | -1.983797000 |
| C | 1.071291000  | 3.770589000  | 2.506609000  |
| N | 1.572475000  | 2.458657000  | 2.848356000  |
| C | 0.853300000  | 1.629404000  | 3.717779000  |
| N | 1.460965000  | 0.373601000  | 3.670518000  |
| C | 2.575023000  | 0.308985000  | 2.761274000  |
| C | 2.596755000  | 1.744599000  | 2.130350000  |
| N | 2.362814000  | -0.565636000 | 1.609244000  |
| C | 2.102709000  | 0.148845000  | 0.484068000  |
| N | 2.281274000  | 1.477341000  | 0.729963000  |
| C | -3.607929000 | -1.213882000 | -2.857770000 |
| C | -1.520933000 | 3.182456000  | -2.999948000 |
| C | 2.490714000  | 2.443838000  | -0.325684000 |
| O | -4.593089000 | 1.729699000  | 1.301801000  |
| O | -1.796604000 | 3.380886000  | 2.460813000  |
| O | -0.078883000 | 1.949204000  | 4.413182000  |
| O | -1.316358000 | 0.335677000  | -3.312494000 |
| O | -1.063646000 | -2.077992000 | -1.742054000 |
| O | 0.933571000  | 1.729597000  | -2.566228000 |
| O | 1.775876000  | -0.350044000 | -0.610421000 |
| C | 0.802728000  | -0.772558000 | 4.239593000  |
| C | -1.271499000 | -4.373839000 | -0.028372000 |
| C | 2.653837000  | -1.999237000 | 1.573715000  |
| O | -5.057323000 | -1.004923000 | 2.348982000  |
| O | -1.781597000 | -0.419403000 | 2.856765000  |
| O | 1.378486000  | -3.379982000 | -0.594828000 |
| O | 1.318299000  | -1.644894000 | -3.003422000 |
| O | -1.092946000 | 0.650227000  | -0.248050000 |
| H | -1.380587000 | 1.584929000  | -0.170281000 |
| H | -1.307555000 | 0.244261000  | 0.614875000  |

|   |              |              |              |
|---|--------------|--------------|--------------|
| H | -3.577274000 | 3.901571000  | 1.005661000  |
| H | -3.344904000 | 4.755045000  | -0.552782000 |
| H | 1.906710000  | 4.455359000  | 2.332194000  |
| H | 0.488276000  | 4.111283000  | 3.364767000  |
| H | -6.341046000 | 0.040449000  | 0.514247000  |
| H | -6.479183000 | -0.556025000 | -1.165046000 |
| H | -5.473582000 | 1.087238000  | -2.792800000 |
| H | -4.339187000 | 3.268639000  | -2.630348000 |
| H | -1.072371000 | 5.256702000  | -1.039917000 |
| H | 1.166411000  | 5.083944000  | -0.028946000 |
| H | 3.571087000  | 2.237407000  | 2.197474000  |
| H | -2.029435000 | 4.117584000  | -3.250007000 |
| H | -0.988037000 | 2.812886000  | -3.877182000 |
| H | 2.902903000  | 1.930692000  | -1.194386000 |
| H | 3.216438000  | 3.178620000  | 0.032725000  |
| H | -2.841109000 | -1.516184000 | -3.572915000 |
| H | -4.590947000 | -1.508317000 | -3.237070000 |
| H | -3.530121000 | -2.468907000 | 3.428945000  |
| H | -3.138823000 | -4.124932000 | 2.890973000  |
| H | 1.517814000  | -1.383251000 | 4.802255000  |
| H | 0.052241000  | -0.373722000 | 4.925798000  |
| H | -5.180291000 | -2.979553000 | -1.445906000 |
| H | -4.064042000 | -4.458100000 | 0.176652000  |
| H | -0.826817000 | -4.619717000 | 2.855106000  |
| H | 1.181316000  | -3.445836000 | 3.668422000  |
| H | 3.510832000  | 0.038231000  | 3.260181000  |
| H | -1.773222000 | -5.278598000 | 0.328037000  |
| H | -0.731481000 | -4.599984000 | -0.949344000 |
| H | 3.140390000  | -2.223853000 | 0.625201000  |
| H | 3.351296000  | -2.199951000 | 2.392389000  |
| H | 1.503621000  | -2.384709000 | -2.386184000 |
| C | 5.305617000  | -1.748443000 | -0.478658000 |
| C | 4.896653000  | -1.758189000 | -1.818532000 |
| C | 5.581707000  | -0.554377000 | 0.201610000  |
| H | 5.428930000  | -2.696332000 | 0.041603000  |
| C | 4.778380000  | -0.503501000 | -2.524883000 |
| C | 4.602504000  | -2.973365000 | -2.514468000 |
| C | 5.482691000  | 0.699242000  | -0.511703000 |
| C | 5.971512000  | -0.532158000 | 1.578584000  |
| C | 5.088227000  | 0.688464000  | -1.857120000 |
| C | 4.365416000  | -0.524766000 | -3.895510000 |
| C | 4.228429000  | -2.955875000 | -3.833053000 |
| H | 4.691732000  | -3.914676000 | -1.979172000 |
| C | 5.807869000  | 1.908352000  | 0.182057000  |
| C | 6.254261000  | 0.650645000  | 2.214270000  |
| H | 6.069727000  | -1.478377000 | 2.106002000  |
| H | 5.045562000  | 1.627446000  | -2.406203000 |
| H | 2.179049000  | -1.369989000 | -3.375439000 |
| C | 4.107807000  | -1.714848000 | -4.533650000 |
| H | 4.282062000  | 0.417400000  | -4.431137000 |

|   |             |              |              |
|---|-------------|--------------|--------------|
| H | 4.021037000 | -3.884038000 | -4.356403000 |
| C | 6.179053000 | 1.887746000  | 1.503293000  |
| H | 5.785330000 | 2.846054000  | -0.369018000 |
| H | 6.572613000 | 0.651797000  | 3.252802000  |
| H | 3.815633000 | -1.719798000 | -5.579607000 |
| H | 6.449392000 | 2.809920000  | 2.010118000  |

**<sup>3</sup>P<sub>DHA</sub>**

|    |              |              |              |
|----|--------------|--------------|--------------|
| Fe | 0.118251000  | 0.036560000  | -1.779390000 |
| C  | 0.858633000  | -3.489552000 | 0.018140000  |
| N  | -0.357819000 | -4.091461000 | 0.312816000  |
| C  | -0.701535000 | -4.015867000 | 1.726699000  |
| C  | 0.590735000  | -3.406036000 | 2.379258000  |
| N  | 1.451528000  | -3.166862000 | 1.230433000  |
| N  | 0.115186000  | -2.196424000 | 3.001369000  |
| C  | -1.167853000 | -1.878423000 | 2.567852000  |
| N  | -1.718628000 | -3.035456000 | 2.019588000  |
| C  | -3.144372000 | -3.338966000 | 2.095468000  |
| N  | -3.913959000 | -2.894017000 | 0.966660000  |
| C  | -4.761164000 | -1.791791000 | 1.079978000  |
| N  | -5.146639000 | -1.443648000 | -0.221501000 |
| C  | -4.457530000 | -2.224014000 | -1.214460000 |
| C  | -3.730059000 | -3.342570000 | -0.389054000 |
| N  | -2.354252000 | -3.275843000 | -0.868885000 |
| C  | -2.137719000 | -2.143385000 | -1.595551000 |
| N  | -3.340014000 | -1.540449000 | -1.867443000 |
| C  | -5.777172000 | -0.163427000 | -0.469390000 |
| N  | -4.861866000 | 0.953981000  | -0.696016000 |
| C  | -4.407524000 | 1.735911000  | 0.365244000  |
| N  | -3.752251000 | 2.841580000  | -0.190025000 |
| C  | -3.739276000 | 2.835234000  | -1.627653000 |
| C  | -4.496310000 | 1.496544000  | -1.978269000 |
| N  | -2.414820000 | 2.641492000  | -2.223393000 |
| C  | -2.273215000 | 1.383079000  | -2.731511000 |
| N  | -3.468415000 | 0.740594000  | -2.699592000 |
| C  | -3.047306000 | 3.766577000  | 0.652350000  |
| N  | -1.600140000 | 3.493253000  | 0.740848000  |
| C  | -1.064670000 | 3.235256000  | 2.040580000  |
| N  | 0.299871000  | 3.484030000  | 1.977421000  |
| C  | 0.704262000  | 4.054049000  | 0.718533000  |
| C  | -0.647348000 | 4.282281000  | -0.036586000 |
| N  | 1.401476000  | 3.152109000  | -0.195674000 |
| C  | 0.713010000  | 2.925743000  | -1.350339000 |
| N  | -0.396915000 | 3.741291000  | -1.361277000 |
| C  | 1.167991000  | 3.247870000  | 3.134396000  |
| N  | 1.655030000  | 1.893568000  | 3.272391000  |
| C  | 0.913576000  | 0.948680000  | 3.993273000  |
| N  | 1.480006000  | -0.297883000 | 3.723516000  |
| C  | 2.594056000  | -0.238330000 | 2.814057000  |

|   |              |              |              |
|---|--------------|--------------|--------------|
| C | 2.643758000  | 1.278390000  | 2.424499000  |
| N | 2.362797000  | -0.910784000 | 1.537219000  |
| C | 2.096930000  | -0.019894000 | 0.548917000  |
| N | 2.291462000  | 1.251173000  | 1.006648000  |
| C | -3.528465000 | -0.666339000 | -3.009729000 |
| C | -1.394559000 | 3.661239000  | -2.409212000 |
| C | 2.561078000  | 2.365388000  | 0.120426000  |
| O | -4.567514000 | 1.530615000  | 1.542678000  |
| O | -1.697606000 | 2.859482000  | 2.992127000  |
| O | -0.004626000 | 1.171482000  | 4.742955000  |
| O | -1.218644000 | 0.892963000  | -3.170117000 |
| O | -1.022151000 | -1.753614000 | -1.974571000 |
| O | 1.039919000  | 2.113345000  | -2.223510000 |
| O | 1.749927000  | -0.329492000 | -0.609766000 |
| C | 0.786884000  | -1.502764000 | 4.095114000  |
| C | -1.338211000 | -4.321203000 | -0.713695000 |
| C | 2.614760000  | -2.330762000 | 1.276981000  |
| O | -5.125888000 | -1.274499000 | 2.106289000  |
| O | -1.706952000 | -0.785776000 | 2.638778000  |
| O | 1.338787000  | -3.315532000 | -1.089179000 |
| O | 1.171760000  | -0.744552000 | -3.241311000 |
| O | -1.060112000 | 0.652770000  | -0.167658000 |
| H | -1.299881000 | 1.582251000  | 0.050187000  |
| H | -1.214669000 | 0.134620000  | 0.650669000  |
| H | -3.459543000 | 3.655967000  | 1.658362000  |
| H | -3.202560000 | 4.792440000  | 0.297559000  |
| H | 2.010847000  | 3.942711000  | 3.072208000  |
| H | 0.583111000  | 3.456456000  | 4.032510000  |
| H | -6.361200000 | 0.064612000  | 0.424494000  |
| H | -6.443331000 | -0.244886000 | -1.333972000 |
| H | -5.371511000 | 1.637660000  | -2.620827000 |
| H | -4.207211000 | 3.732588000  | -2.047043000 |
| H | -0.945374000 | 5.334629000  | -0.094910000 |
| H | 1.291045000  | 4.966823000  | 0.867090000  |
| H | 3.633370000  | 1.728481000  | 2.547963000  |
| H | -1.889353000 | 4.632276000  | -2.495737000 |
| H | -0.863334000 | 3.439314000  | -3.335794000 |
| H | 2.953808000  | 1.980299000  | -0.819922000 |
| H | 3.321487000  | 2.992563000  | 0.593992000  |
| H | -2.743463000 | -0.862647000 | -3.741900000 |
| H | -4.502716000 | -0.890699000 | -3.454305000 |
| H | -3.578750000 | -2.839315000 | 2.964564000  |
| H | -3.234835000 | -4.424102000 | 2.222718000  |
| H | 1.480161000  | -2.220309000 | 4.547529000  |
| H | 0.047570000  | -1.200344000 | 4.840168000  |
| H | -5.149546000 | -2.612012000 | -1.970347000 |
| H | -4.133018000 | -4.348793000 | -0.548548000 |
| H | -0.972693000 | -5.003832000 | 2.112185000  |
| H | 1.080827000  | -4.063922000 | 3.103895000  |
| H | 3.523587000  | -0.607641000 | 3.258723000  |

|   |              |              |              |
|---|--------------|--------------|--------------|
| H | -1.875161000 | -5.253573000 | -0.515608000 |
| H | -0.789224000 | -4.412445000 | -1.652422000 |
| H | 3.098181000  | -2.414173000 | 0.304749000  |
| H | 3.302513000  | -2.673089000 | 2.055580000  |
| H | 1.537868000  | -1.596692000 | -2.925904000 |
| C | 5.083907000  | -1.728091000 | -1.015548000 |
| C | 4.654317000  | -1.360597000 | -2.296890000 |
| C | 5.472692000  | -0.774033000 | -0.064961000 |
| H | 5.128979000  | -2.784607000 | -0.758880000 |
| C | 4.648145000  | 0.036978000  | -2.661658000 |
| C | 4.230898000  | -2.328296000 | -3.262943000 |
| C | 5.471457000  | 0.624083000  | -0.431965000 |
| C | 5.875417000  | -1.135216000 | 1.260136000  |
| C | 5.072554000  | 0.989005000  | -1.725589000 |
| C | 4.217319000  | 0.401126000  | -3.978478000 |
| C | 3.842265000  | -1.943235000 | -4.520816000 |
| H | 4.233047000  | -3.378125000 | -2.982941000 |
| C | 5.882415000  | 1.588411000  | 0.542955000  |
| C | 6.245122000  | -0.179079000 | 2.172129000  |
| H | 5.908314000  | -2.189859000 | 1.523831000  |
| H | 5.107286000  | 2.037296000  | -2.016740000 |
| H | 1.948882000  | -0.217136000 | -3.522378000 |
| C | 3.836959000  | -0.560016000 | -4.884488000 |
| H | 4.221688000  | 1.451514000  | -4.258055000 |
| H | 3.538485000  | -2.686207000 | -5.251765000 |
| C | 6.252217000  | 1.202148000  | 1.806989000  |
| H | 5.924651000  | 2.635919000  | 0.252569000  |
| H | 6.570297000  | -0.468281000 | 3.167436000  |
| H | 3.532426000  | -0.274134000 | -5.886884000 |
| H | 6.585356000  | 1.941931000  | 2.529482000  |

### <sup>5</sup>TS1<sub>Et</sub>

|    |             |              |              |
|----|-------------|--------------|--------------|
| Fe | 0.201829000 | 0.203378000  | 2.373682000  |
| C  | 1.931028000 | -3.345160000 | 0.908735000  |
| N  | 2.862584000 | -3.002404000 | -0.063655000 |
| C  | 2.430835000 | -3.341616000 | -1.411959000 |
| C  | 1.074807000 | -4.105208000 | -1.174171000 |
| N  | 0.925631000 | -4.065160000 | 0.273880000  |
| N  | 0.110018000 | -3.295042000 | -1.875687000 |
| C  | 0.650529000 | -2.067542000 | -2.245990000 |
| N  | 2.035399000 | -2.195254000 | -2.193766000 |
| C  | 2.930425000 | -1.455935000 | -3.075595000 |
| N  | 3.347040000 | -0.175561000 | -2.569969000 |
| C  | 2.816569000 | 1.000924000  | -3.097544000 |
| N  | 3.203601000 | 2.036895000  | -2.236085000 |
| C  | 3.878150000 | 1.544609000  | -1.066832000 |
| C  | 4.100754000 | 0.023283000  | -1.361359000 |
| N  | 3.539984000 | -0.639845000 | -0.185280000 |
| C  | 2.820790000 | 0.229345000  | 0.575513000  |

|   |              |              |              |
|---|--------------|--------------|--------------|
| N | 3.055868000  | 1.510986000  | 0.145885000  |
| C | 2.606929000  | 3.348715000  | -2.362322000 |
| N | 1.376471000  | 3.552344000  | -1.598004000 |
| C | 0.128870000  | 3.256248000  | -2.148307000 |
| N | -0.837554000 | 3.740768000  | -1.256240000 |
| C | -0.275259000 | 4.378064000  | -0.099014000 |
| C | 1.277500000  | 4.205556000  | -0.322291000 |
| N | -0.516064000 | 3.662513000  | 1.161349000  |
| C | 0.602630000  | 3.016278000  | 1.583490000  |
| N | 1.662486000  | 3.376349000  | 0.828970000  |
| C | -2.238054000 | 3.514610000  | -1.496340000 |
| N | -2.774051000 | 2.358111000  | -0.759929000 |
| C | -3.309506000 | 1.276187000  | -1.517288000 |
| N | -4.126258000 | 0.543840000  | -0.661693000 |
| C | -4.261157000 | 1.149873000  | 0.633515000  |
| C | -3.525008000 | 2.525827000  | 0.475754000  |
| N | -3.481544000 | 0.526999000  | 1.711214000  |
| C | -2.523543000 | 1.346721000  | 2.198821000  |
| N | -2.666811000 | 2.591394000  | 1.652291000  |
| C | -4.757383000 | -0.701828000 | -1.103230000 |
| N | -3.928556000 | -1.880704000 | -0.991801000 |
| C | -3.121181000 | -2.287043000 | -2.063152000 |
| N | -2.312159000 | -3.317217000 | -1.584963000 |
| C | -2.531016000 | -3.625738000 | -0.198218000 |
| C | -3.597505000 | -2.561032000 | 0.230732000  |
| N | -1.389422000 | -3.341728000 | 0.674370000  |
| C | -1.569008000 | -2.184298000 | 1.363643000  |
| N | -2.857039000 | -1.750502000 | 1.197338000  |
| C | 2.913449000  | 2.675671000  | 0.994757000  |
| C | -1.742085000 | 3.671216000  | 1.941103000  |
| C | -3.523039000 | -0.855784000 | 2.116799000  |
| O | -0.093057000 | 2.714314000  | -3.201396000 |
| O | -3.076899000 | 1.053203000  | -2.675671000 |
| O | -3.153289000 | -1.862211000 | -3.190688000 |
| O | 0.667548000  | 2.220519000  | 2.544044000  |
| O | 2.091635000  | -0.106143000 | 1.530733000  |
| O | -1.654478000 | 1.000181000  | 3.022514000  |
| O | -0.696491000 | -1.633641000 | 2.068812000  |
| C | -1.181456000 | -3.769505000 | -2.353577000 |
| C | 3.863684000  | -2.016653000 | 0.222471000  |
| C | -0.310604000 | -4.306249000 | 0.955540000  |
| O | 2.191808000  | 1.108770000  | -4.122670000 |
| O | 0.026276000  | -1.062188000 | -2.546018000 |
| O | 1.994281000  | -3.094207000 | 2.094560000  |
| O | 0.684591000  | -0.146317000 | 3.893177000  |
| O | -0.389029000 | 0.617927000  | 0.205784000  |
| H | -1.049506000 | 1.266236000  | -0.118562000 |
| H | -0.179848000 | 0.054823000  | -0.568769000 |
| H | -2.349040000 | 3.298802000  | -2.562039000 |
| H | -2.812296000 | 4.411822000  | -1.236848000 |

|   |              |              |              |
|---|--------------|--------------|--------------|
| H | -5.682233000 | -0.836212000 | -0.534138000 |
| H | -4.991116000 | -0.590578000 | -2.164068000 |
| H | 2.361941000  | 3.470349000  | -3.419419000 |
| H | 3.329405000  | 4.113899000  | -2.061475000 |
| H | 1.836718000  | 5.146127000  | -0.300441000 |
| H | -0.597509000 | 5.419877000  | 0.001558000  |
| H | -4.200136000 | 3.387080000  | 0.439343000  |
| H | -5.310186000 | 1.234186000  | 0.934375000  |
| H | -4.485670000 | -2.988025000 | 0.709455000  |
| H | -2.255479000 | 4.621025000  | 1.772488000  |
| H | -1.470533000 | 3.588096000  | 2.994637000  |
| H | -3.044098000 | -0.917570000 | 3.095448000  |
| H | -4.565969000 | -1.173843000 | 2.207093000  |
| H | 2.971520000  | 2.370637000  | 2.040803000  |
| H | 3.736732000  | 3.361264000  | 0.775181000  |
| H | 2.426677000  | -1.249806000 | -4.022858000 |
| H | 3.799006000  | -2.097388000 | -3.262327000 |
| H | -1.138394000 | -4.863991000 | -2.364139000 |
| H | -1.351828000 | -3.408365000 | -3.370345000 |
| H | 4.802538000  | 2.098855000  | -0.870308000 |
| H | 5.152240000  | -0.259942000 | -1.478965000 |
| H | 3.191642000  | -3.936076000 | -1.927235000 |
| H | 1.074008000  | -5.136843000 | -1.539113000 |
| H | -2.853338000 | -4.662526000 | -0.054054000 |
| H | 4.801527000  | -2.270568000 | -0.280253000 |
| H | 4.018350000  | -2.030668000 | 1.302515000  |
| H | -0.089382000 | -4.276921000 | 2.023951000  |
| H | -0.706469000 | -5.291955000 | 0.693498000  |
| C | 2.720028000  | -1.003147000 | 5.589479000  |
| H | 2.994067000  | -0.267661000 | 6.353625000  |
| H | 2.564321000  | -1.980897000 | 6.058075000  |
| H | 1.708760000  | -0.686705000 | 5.209406000  |
| C | 3.701765000  | -1.057935000 | 4.429344000  |
| H | 4.691918000  | -1.377097000 | 4.781250000  |
| H | 3.360316000  | -1.765093000 | 3.667362000  |
| H | 3.815644000  | -0.072059000 | 3.961503000  |

**Imaginary Frequency:** $i190\text{ cm}^{-1}$

**<sup>3</sup>TS1<sub>Et</sub>**

|    |              |              |              |
|----|--------------|--------------|--------------|
| Fe | -0.087926000 | -0.397132000 | 2.287471000  |
| C  | -1.882335000 | 3.374769000  | 1.134623000  |
| N  | -2.827184000 | 3.076918000  | 0.159457000  |
| C  | -2.410534000 | 3.468176000  | -1.178854000 |
| C  | -1.035913000 | 4.192979000  | -0.929529000 |
| N  | -0.866993000 | 4.091943000  | 0.512772000  |
| N  | -0.098108000 | 3.394005000  | -1.679224000 |
| C  | -0.670732000 | 2.197965000  | -2.099651000 |
| N  | -2.051254000 | 2.353561000  | -2.020580000 |

|   |              |              |              |
|---|--------------|--------------|--------------|
| C | -2.975272000 | 1.673368000  | -2.917552000 |
| N | -3.400115000 | 0.376427000  | -2.464260000 |
| C | -2.900250000 | -0.778968000 | -3.061832000 |
| N | -3.279005000 | -1.850386000 | -2.241078000 |
| C | -3.914354000 | -1.405317000 | -1.031242000 |
| C | -4.123605000 | 0.129553000  | -1.245181000 |
| N | -3.526478000 | 0.726647000  | -0.053033000 |
| C | -2.789486000 | -0.183612000 | 0.648501000  |
| N | -3.061556000 | -1.442947000 | 0.158280000  |
| C | -2.704258000 | -3.160988000 | -2.446705000 |
| N | -1.462989000 | -3.422566000 | -1.716748000 |
| C | -0.221225000 | -3.115874000 | -2.273505000 |
| N | 0.754146000  | -3.676333000 | -1.435896000 |
| C | 0.201848000  | -4.351395000 | -0.295951000 |
| C | -1.351847000 | -4.146707000 | -0.482216000 |
| N | 0.476758000  | -3.691667000 | 0.989963000  |
| C | -0.625916000 | -3.051855000 | 1.458965000  |
| N | -1.704099000 | -3.372854000 | 0.718650000  |
| C | 2.153428000  | -3.454777000 | -1.690435000 |
| N | 2.719822000  | -2.342653000 | -0.907030000 |
| C | 3.262395000  | -1.231392000 | -1.622045000 |
| N | 4.098062000  | -0.550854000 | -0.743584000 |
| C | 4.256064000  | -1.229254000 | 0.513344000  |
| C | 3.499872000  | -2.588271000 | 0.298294000  |
| N | 3.507348000  | -0.658501000 | 1.641717000  |
| C | 2.545992000  | -1.488672000 | 2.092821000  |
| N | 2.667384000  | -2.708249000 | 1.489632000  |
| C | 4.747054000  | 0.705655000  | -1.134113000 |
| N | 3.946770000  | 1.894964000  | -0.953291000 |
| C | 3.120714000  | 2.358797000  | -1.987171000 |
| N | 2.326931000  | 3.365939000  | -1.441902000 |
| C | 2.572400000  | 3.603213000  | -0.042947000 |
| C | 3.616056000  | 2.492991000  | 0.312532000  |
| N | 1.440412000  | 3.302079000  | 0.831048000  |
| C | 1.571026000  | 2.074700000  | 1.410424000  |
| N | 2.856043000  | 1.623658000  | 1.209413000  |
| C | -2.937001000 | -2.652114000 | 0.939338000  |
| C | 1.716921000  | -3.773370000 | 1.744105000  |
| C | 3.529291000  | 0.709330000  | 2.100686000  |
| O | -0.009656000 | -2.513584000 | -3.295272000 |
| O | 3.015031000  | -0.952197000 | -2.764714000 |
| O | 3.129661000  | 1.990772000  | -3.135365000 |
| O | -0.671869000 | -2.288225000 | 2.453159000  |
| O | -2.027706000 | 0.101330000  | 1.590577000  |
| O | 1.681504000  | -1.172643000 | 2.935239000  |
| O | 0.661996000  | 1.495106000  | 2.033031000  |
| C | 1.189425000  | 3.869020000  | -2.166160000 |
| C | -3.828506000 | 2.085564000  | 0.422182000  |
| C | 0.387647000  | 4.269597000  | 1.182216000  |
| O | -2.304009000 | -0.846101000 | -4.107483000 |



|   |              |              |              |
|---|--------------|--------------|--------------|
| O | -0.073775000 | 1.195325000  | -2.458823000 |
| O | -1.948340000 | 3.095135000  | 2.313518000  |
| O | -0.498997000 | -0.013133000 | 3.885689000  |
| O | 0.372001000  | -0.703944000 | 0.170707000  |
| H | 1.065465000  | -1.284710000 | -0.212624000 |
| H | 0.153220000  | -0.055064000 | -0.530547000 |
| H | 2.247748000  | -3.186734000 | -2.745808000 |
| H | 2.720190000  | -4.370960000 | -1.487533000 |
| H | 5.681847000  | 0.792140000  | -0.572273000 |
| H | 4.964399000  | 0.641832000  | -2.202297000 |
| H | -2.479500000 | -3.229299000 | -3.513062000 |
| H | -3.431308000 | -3.932335000 | -2.173546000 |
| H | -1.925022000 | -5.078789000 | -0.499112000 |
| H | 0.509881000  | -5.400839000 | -0.241937000 |
| H | 4.163866000  | -3.452737000 | 0.196924000  |
| H | 5.310450000  | -1.340734000 | 0.784388000  |
| H | 4.507418000  | 2.869908000  | 0.825867000  |
| H | 2.196919000  | -4.729462000 | 1.521344000  |
| H | 1.467493000  | -3.731511000 | 2.805495000  |
| H | 3.045505000  | 0.722105000  | 3.078964000  |
| H | 4.567818000  | 1.035461000  | 2.209839000  |
| H | -2.971739000 | -2.408067000 | 2.001776000  |
| H | -3.777012000 | -3.308232000 | 0.694799000  |
| H | -2.495512000 | 1.505995000  | -3.884707000 |
| H | -3.837266000 | 2.335979000  | -3.054297000 |
| H | 1.163574000  | 4.963556000  | -2.128202000 |
| H | 1.332359000  | 3.550112000  | -3.201175000 |
| H | -4.841992000 | -1.955657000 | -0.838068000 |
| H | -5.174017000 | 0.430426000  | -1.323060000 |
| H | -3.166780000 | 4.101186000  | -1.653506000 |
| H | -1.018864000 | 5.238445000  | -1.252719000 |
| H | 2.923557000  | 4.623559000  | 0.143783000  |
| H | -4.776905000 | 2.367605000  | -0.044821000 |
| H | -3.956524000 | 2.055244000  | 1.505399000  |
| H | 0.182258000  | 4.187570000  | 2.251098000  |
| H | 0.800533000  | 5.259809000  | 0.967383000  |
| C | -2.916283000 | -0.216322000 | 4.633698000  |
| H | -2.840905000 | -0.889090000 | 5.491279000  |
| H | -1.688906000 | -0.190451000 | 4.208820000  |
| H | -3.428193000 | -0.670468000 | 3.781772000  |
| C | -3.257595000 | 1.218764000  | 4.922844000  |
| H | -4.314980000 | 1.291822000  | 5.224070000  |
| H | -2.656767000 | 1.613811000  | 5.747515000  |
| H | -3.104358000 | 1.854033000  | 4.045373000  |

**Imaginary Frequency:**  $i1031\text{ cm}^{-1}$

**$^{55}\text{P}_{\text{Et}}$**

|    |             |              |             |
|----|-------------|--------------|-------------|
| Fe | 0.026862000 | -0.098301000 | 2.293617000 |
|----|-------------|--------------|-------------|

|   |              |              |              |
|---|--------------|--------------|--------------|
| C | -0.971892000 | 3.667457000  | 1.065720000  |
| N | -2.091806000 | 3.564365000  | 0.253805000  |
| C | -1.804899000 | 3.820522000  | -1.151550000 |
| C | -0.282094000 | 4.216997000  | -1.138454000 |
| N | 0.067960000  | 4.135367000  | 0.273398000  |
| N | 0.335197000  | 3.194907000  | -1.945499000 |
| C | -0.553203000 | 2.161872000  | -2.231337000 |
| N | -1.834539000 | 2.636204000  | -1.972264000 |
| C | -3.016747000 | 2.139289000  | -2.667211000 |
| N | -3.624640000 | 0.982384000  | -2.069578000 |
| C | -3.432577000 | -0.283375000 | -2.626242000 |
| N | -3.905456000 | -1.208512000 | -1.688743000 |
| C | -4.315056000 | -0.584703000 | -0.460576000 |
| C | -4.215663000 | 0.951601000  | -0.759841000 |
| N | -3.354295000 | 1.454256000  | 0.310409000  |
| C | -2.809990000 | 0.436432000  | 1.033401000  |
| N | -3.383803000 | -0.749461000 | 0.656466000  |
| C | -3.657522000 | -2.622844000 | -1.864634000 |
| N | -2.420858000 | -3.116135000 | -1.264890000 |
| C | -1.229057000 | -3.133803000 | -1.988729000 |
| N | -0.298489000 | -3.850123000 | -1.226672000 |
| C | -0.823771000 | -4.313263000 | 0.027321000  |
| C | -2.307005000 | -3.775117000 | 0.007795000  |
| N | -0.245003000 | -3.663085000 | 1.207531000  |
| C | -1.115530000 | -2.777599000 | 1.769328000  |
| N | -2.328448000 | -2.882325000 | 1.171693000  |
| C | 1.070941000  | -3.953391000 | -1.651912000 |
| N | 1.949617000  | -2.945940000 | -1.036325000 |
| C | 2.623880000  | -2.041485000 | -1.905772000 |
| N | 3.696878000  | -1.515628000 | -1.194706000 |
| C | 3.864411000  | -2.128258000 | 0.094487000  |
| C | 2.806606000  | -3.282280000 | 0.093725000  |
| N | 3.429253000  | -1.332908000 | 1.244646000  |
| C | 2.405671000  | -1.910769000 | 1.931139000  |
| N | 2.147760000  | -3.143856000 | 1.382680000  |
| C | 4.540516000  | -0.467185000 | -1.767051000 |
| N | 4.041409000  | 0.879085000  | -1.592891000 |
| C | 3.184248000  | 1.444474000  | -2.546108000 |
| N | 2.707188000  | 2.634372000  | -1.998990000 |
| C | 3.217125000  | 2.909988000  | -0.684361000 |
| C | 4.073204000  | 1.633295000  | -0.368538000 |
| N | 2.204576000  | 2.917218000  | 0.373840000  |
| C | 2.241160000  | 1.769115000  | 1.103037000  |
| N | 3.339250000  | 1.035592000  | 0.746496000  |
| C | -3.369859000 | -1.934933000 | 1.490986000  |
| C | 1.038118000  | -3.966787000 | 1.821393000  |
| C | 3.892446000  | -0.012092000 | 1.580185000  |
| O | -1.031794000 | -2.655397000 | -3.077784000 |
| O | 2.303328000  | -1.789514000 | -3.037435000 |
| O | 2.942852000  | 1.012528000  | -3.645389000 |

|   |              |              |              |
|---|--------------|--------------|--------------|
| O | -0.849781000 | -1.997476000 | 2.700774000  |
| O | -1.950645000 | 0.578269000  | 1.923153000  |
| O | 1.812973000  | -1.393707000 | 2.888674000  |
| O | 1.421658000  | 1.453404000  | 1.989455000  |
| C | 1.616940000  | 3.337512000  | -2.622142000 |
| C | -3.259971000 | 2.864421000  | 0.710696000  |
| C | 1.417886000  | 4.099252000  | 0.757881000  |
| O | -2.993488000 | -0.523339000 | -3.722900000 |
| O | -0.258800000 | 1.045378000  | -2.624987000 |
| O | -0.917650000 | 3.428263000  | 2.257495000  |
| O | 0.011434000  | 0.351893000  | 4.315635000  |
| O | 0.209595000  | -0.618513000 | 0.089804000  |
| H | 0.656022000  | -1.420445000 | -0.253375000 |
| H | 0.009135000  | -0.077027000 | -0.702001000 |
| H | 1.085367000  | -3.778164000 | -2.730502000 |
| H | 1.454569000  | -4.956974000 | -1.433149000 |
| H | 5.540678000  | -0.555093000 | -1.332070000 |
| H | 4.591545000  | -0.639319000 | -2.844130000 |
| H | -3.590403000 | -2.788351000 | -2.941896000 |
| H | -4.494215000 | -3.197891000 | -1.454983000 |
| H | -3.063649000 | -4.557080000 | 0.129023000  |
| H | -0.747656000 | -5.401226000 | 0.129475000  |
| H | 3.245850000  | -4.280358000 | -0.010356000 |
| H | 4.894775000  | -2.467707000 | 0.244983000  |
| H | 5.101068000  | 1.852935000  | -0.058860000 |
| H | 1.279869000  | -5.013386000 | 1.618456000  |
| H | 0.937423000  | -3.820128000 | 2.897558000  |
| H | 3.611940000  | 0.172217000  | 2.618337000  |
| H | 4.982640000  | 0.025386000  | 1.489992000  |
| H | -3.219737000 | -1.635043000 | 2.529237000  |
| H | -4.340918000 | -2.429607000 | 1.395771000  |
| H | -2.743313000 | 1.840573000  | -3.681820000 |
| H | -3.731898000 | 2.967971000  | -2.715775000 |
| H | 1.835499000  | 4.409743000  | -2.679930000 |
| H | 1.542107000  | 2.931094000  | -3.633311000 |
| H | -5.315502000 | -0.913169000 | -0.157109000 |
| H | -5.178947000 | 1.473047000  | -0.733333000 |
| H | -2.464578000 | 4.599512000  | -1.546415000 |
| H | -0.078565000 | 5.218157000  | -1.531261000 |
| H | 3.786717000  | 3.845449000  | -0.653141000 |
| H | -4.162928000 | 3.356018000  | 0.336250000  |
| H | -3.246525000 | 2.916417000  | 1.800511000  |
| H | 1.358877000  | 4.136391000  | 1.846719000  |
| H | 1.971647000  | 4.970545000  | 0.395383000  |
| C | -0.176961000 | 1.694106000  | 4.883070000  |
| H | 0.261457000  | 2.399319000  | 4.175111000  |
| H | 0.367276000  | 1.734669000  | 5.830949000  |
| H | 0.662227000  | -0.159909000 | 4.820876000  |
| C | -1.658556000 | 1.946047000  | 5.066286000  |
| H | -2.166471000 | 1.859724000  | 4.103025000  |

|   |              |             |             |
|---|--------------|-------------|-------------|
| H | -2.093927000 | 1.234320000 | 5.774688000 |
| H | -1.812394000 | 2.961507000 | 5.446260000 |

**<sup>3</sup>P<sub>Et</sub>**

|    |              |              |              |
|----|--------------|--------------|--------------|
| Fe | -0.054040000 | 0.181088000  | 2.218578000  |
| C  | 0.767877000  | -3.710460000 | 1.165935000  |
| N  | 1.890611000  | -3.703414000 | 0.350333000  |
| C  | 1.576431000  | -3.945308000 | -1.051148000 |
| C  | 0.034803000  | -4.259593000 | -1.025922000 |
| N  | -0.305821000 | -4.113559000 | 0.382700000  |
| N  | -0.528433000 | -3.229530000 | -1.860129000 |
| C  | 0.402185000  | -2.228917000 | -2.124907000 |
| N  | 1.661689000  | -2.761233000 | -1.870032000 |
| C  | 2.860958000  | -2.348953000 | -2.592448000 |
| N  | 3.556992000  | -1.233993000 | -2.013999000 |
| C  | 3.470025000  | 0.030838000  | -2.596063000 |
| N  | 4.007765000  | 0.934983000  | -1.672738000 |
| C  | 4.345419000  | 0.303630000  | -0.425685000 |
| C  | 4.160462000  | -1.227824000 | -0.707910000 |
| N  | 3.281025000  | -1.671369000 | 0.370725000  |
| C  | 2.761728000  | -0.613669000 | 1.058131000  |
| N  | 3.395127000  | 0.538227000  | 0.662248000  |
| C  | 3.851245000  | 2.359922000  | -1.872317000 |
| N  | 2.634756000  | 2.939769000  | -1.308685000 |
| C  | 1.457292000  | 3.006074000  | -2.053075000 |
| N  | 0.551541000  | 3.779853000  | -1.317462000 |
| C  | 1.083165000  | 4.248342000  | -0.067781000 |
| C  | 2.531214000  | 3.619999000  | -0.046368000 |
| N  | 0.444762000  | 3.666936000  | 1.116796000  |
| C  | 1.242830000  | 2.730536000  | 1.702747000  |
| N  | 2.468165000  | 2.740644000  | 1.126709000  |
| C  | -0.807779000 | 3.926969000  | -1.756111000 |
| N  | -1.738210000 | 2.986489000  | -1.103774000 |
| C  | -2.459293000 | 2.093965000  | -1.951577000 |
| N  | -3.581284000 | 1.675527000  | -1.245599000 |
| C  | -3.728665000 | 2.349305000  | 0.015350000  |
| C  | -2.598382000 | 3.430099000  | -0.011048000 |
| N  | -3.364013000 | 1.575243000  | 1.203806000  |
| C  | -2.324362000 | 2.121552000  | 1.894630000  |
| N  | -1.978168000 | 3.311544000  | 1.297770000  |
| C  | -4.494912000 | 0.676632000  | -1.800488000 |
| N  | -4.095411000 | -0.697055000 | -1.588280000 |
| C  | -3.279304000 | -1.346330000 | -2.523879000 |
| N  | -2.865865000 | -2.539534000 | -1.933563000 |
| C  | -3.381314000 | -2.735976000 | -0.606989000 |
| C  | -4.158255000 | -1.401182000 | -0.335731000 |
| N  | -2.363168000 | -2.763228000 | 0.446253000  |
| C  | -2.326811000 | -1.587775000 | 1.130334000  |
| N  | -3.380414000 | -0.802228000 | 0.748905000  |

|   |              |              |              |
|---|--------------|--------------|--------------|
| C | 3.437689000  | 1.731398000  | 1.483389000  |
| C | -0.818075000 | 4.074083000  | 1.715173000  |
| C | -3.889000000 | 0.285679000  | 1.562453000  |
| O | 1.252520000  | 2.522615000  | -3.138276000 |
| O | -2.133164000 | 1.771367000  | -3.063456000 |
| O | -3.022461000 | -0.971705000 | -3.640469000 |
| O | 0.905786000  | 1.984599000  | 2.639978000  |
| O | 1.879318000  | -0.697325000 | 1.928652000  |
| O | -1.786404000 | 1.611338000  | 2.885074000  |
| O | -1.486792000 | -1.290105000 | 2.005337000  |
| C | -1.816465000 | -3.320661000 | -2.532941000 |
| C | 3.103786000  | -3.067369000 | 0.789048000  |
| C | -1.648020000 | -3.978962000 | 0.867971000  |
| O | 3.057329000  | 0.281712000  | -3.700839000 |
| O | 0.155965000  | -1.090598000 | -2.492467000 |
| O | 0.732046000  | -3.450358000 | 2.353375000  |
| O | 0.016294000  | -0.115185000 | 4.152060000  |
| O | -0.137584000 | 0.630992000  | 0.165566000  |
| H | -0.561187000 | 1.432532000  | -0.212335000 |
| H | 0.008516000  | 0.020716000  | -0.588709000 |
| H | -0.822691000 | 3.707721000  | -2.826617000 |
| H | -1.149035000 | 4.954410000  | -1.582547000 |
| H | -5.488629000 | 0.849354000  | -1.376531000 |
| H | -4.526271000 | 0.822406000  | -2.882206000 |
| H | 3.818226000  | 2.513080000  | -2.952911000 |
| H | 4.713046000  | 2.887699000  | -1.451904000 |
| H | 3.331670000  | 4.355136000  | 0.085297000  |
| H | 1.072083000  | 5.341326000  | 0.002954000  |
| H | -2.969440000 | 4.447777000  | -0.173353000 |
| H | -4.736666000 | 2.760993000  | 0.132881000  |
| H | -5.193811000 | -1.548916000 | -0.009637000 |
| H | -0.988313000 | 5.127562000  | 1.478387000  |
| H | -0.731559000 | 3.954148000  | 2.795796000  |
| H | -3.620729000 | 0.110167000  | 2.605224000  |
| H | -4.979407000 | 0.293584000  | 1.467897000  |
| H | 3.240512000  | 1.455183000  | 2.520472000  |
| H | 4.440408000  | 2.162716000  | 1.408351000  |
| H | 2.590408000  | -2.038053000 | -3.604254000 |
| H | 3.515215000  | -3.226318000 | -2.649219000 |
| H | -2.091521000 | -4.380948000 | -2.557332000 |
| H | -1.722023000 | -2.952335000 | -3.557006000 |
| H | 5.355883000  | 0.575052000  | -0.099777000 |
| H | 5.094198000  | -1.800577000 | -0.684957000 |
| H | 2.190128000  | -4.757580000 | -1.452681000 |
| H | -0.223878000 | -5.259139000 | -1.388867000 |
| H | -4.003992000 | -3.634793000 | -0.537732000 |
| H | 3.971606000  | -3.618311000 | 0.414667000  |
| H | 3.096014000  | -3.105784000 | 1.879443000  |
| H | -1.588337000 | -3.986369000 | 1.957412000  |
| H | -2.257420000 | -4.824456000 | 0.534456000  |

|   |              |              |             |
|---|--------------|--------------|-------------|
| C | 0.054009000  | -1.460142000 | 4.761245000 |
| H | -0.400384000 | -2.152788000 | 4.053090000 |
| H | -0.549727000 | -1.408861000 | 5.671996000 |
| H | -0.700819000 | 0.416722000  | 4.537913000 |
| C | 1.494053000  | -1.819152000 | 5.051618000 |
| H | 2.067262000  | -1.823498000 | 4.122853000 |
| H | 1.940699000  | -1.111856000 | 5.757011000 |
| H | 1.533496000  | -2.823780000 | 5.485464000 |

**<sup>5</sup>TS1<sub>Me</sub>**

|    |              |              |              |
|----|--------------|--------------|--------------|
| Fe | -0.028864000 | -0.248878000 | 2.491444000  |
| C  | 1.071710000  | 3.654136000  | 1.292872000  |
| N  | 0.050869000  | 4.165349000  | 0.502072000  |
| C  | 0.415149000  | 4.272211000  | -0.903683000 |
| C  | 1.929897000  | 3.843284000  | -0.914497000 |
| N  | 2.197622000  | 3.543915000  | 0.485535000  |
| N  | 1.940820000  | 2.680999000  | -1.767889000 |
| C  | 0.650649000  | 2.240845000  | -2.048771000 |
| N  | -0.218183000 | 3.282994000  | -1.740439000 |
| C  | -1.484413000 | 3.480625000  | -2.434365000 |
| N  | -2.602232000 | 2.790375000  | -1.848261000 |
| C  | -3.128080000 | 1.649302000  | -2.452783000 |
| N  | -4.015655000 | 1.078881000  | -1.529035000 |
| C  | -3.987665000 | 1.756862000  | -0.262214000 |
| C  | -3.111289000 | 3.028025000  | -0.524977000 |
| N  | -2.099849000 | 2.971524000  | 0.529488000  |
| C  | -2.112056000 | 1.766581000  | 1.162180000  |
| N  | -3.231593000 | 1.067488000  | 0.787277000  |
| C  | -4.529398000 | -0.255794000 | -1.744294000 |
| N  | -3.704277000 | -1.335614000 | -1.203896000 |
| C  | -2.700866000 | -1.927491000 | -1.970780000 |
| N  | -2.256551000 | -3.054120000 | -1.265058000 |
| C  | -2.939537000 | -3.250043000 | -0.017813000 |
| C  | -3.931779000 | -2.024434000 | 0.035832000  |
| N  | -2.099817000 | -3.055120000 | 1.171875000  |
| C  | -2.377066000 | -1.874626000 | 1.785125000  |
| N  | -3.470643000 | -1.307108000 | 1.233037000  |
| C  | -1.147856000 | -3.831095000 | -1.751496000 |
| N  | 0.136000000  | -3.462136000 | -1.132408000 |
| C  | 1.172387000  | -2.985051000 | -1.987748000 |
| N  | 2.369194000  | -3.120778000 | -1.291869000 |
| C  | 2.208197000  | -3.796877000 | -0.034820000 |
| C  | 0.707211000  | -4.248712000 | -0.047923000 |
| N  | 2.242099000  | -2.939885000 | 1.157160000  |
| C  | 1.061959000  | -2.921747000 | 1.816374000  |
| N  | 0.218097000  | -3.844953000 | 1.264177000  |
| C  | 3.629375000  | -2.624278000 | -1.849464000 |
| N  | 3.893586000  | -1.223918000 | -1.609442000 |
| C  | 3.464454000  | -0.250611000 | -2.522801000 |

|   |              |              |              |
|---|--------------|--------------|--------------|
| N | 3.688599000  | 0.987425000  | -1.921738000 |
| C | 4.241392000  | 0.894161000  | -0.598519000 |
| C | 4.304500000  | -0.653066000 | -0.354919000 |
| N | 3.354938000  | 1.376424000  | 0.463245000  |
| C | 2.770342000  | 0.343941000  | 1.127241000  |
| N | 3.352015000  | -0.833737000 | 0.739787000  |
| C | -3.835671000 | 0.038388000  | 1.608457000  |
| C | -1.148692000 | -4.006294000 | 1.721183000  |
| C | 3.302851000  | -2.039038000 | 1.535145000  |
| O | -2.301966000 | -1.569628000 | -3.050019000 |
| O | 1.015663000  | -2.545383000 | -3.095603000 |
| O | 3.032269000  | -0.444867000 | -3.631053000 |
| O | -1.741609000 | -1.383673000 | 2.743074000  |
| O | -1.246537000 | 1.387453000  | 1.977009000  |
| O | 0.803398000  | -2.175630000 | 2.780777000  |
| O | 1.871342000  | 0.464505000  | 1.984330000  |
| C | 3.110885000  | 2.183527000  | -2.478010000 |
| C | -1.302249000 | 4.124885000  | 0.975475000  |
| C | 3.317822000  | 2.771385000  | 0.934734000  |
| O | -2.900824000 | 1.260172000  | -3.570628000 |
| O | 0.338849000  | 1.141230000  | -2.475185000 |
| O | 1.003761000  | 3.385731000  | 2.475263000  |
| O | 0.099602000  | 0.185610000  | 4.086540000  |
| O | -0.192959000 | -0.688137000 | 0.222616000  |
| H | -0.197914000 | -1.563172000 | -0.220164000 |
| H | -0.059189000 | -0.039416000 | -0.497834000 |
| H | -1.060195000 | -3.626819000 | -2.821615000 |
| H | -1.339139000 | -4.898726000 | -1.591150000 |
| H | 4.444209000  | -3.233903000 | -1.447543000 |
| H | 3.578167000  | -2.746485000 | -2.933402000 |
| H | -4.583269000 | -0.390337000 | -2.826604000 |
| H | -5.532006000 | -0.339578000 | -1.313149000 |
| H | -4.981565000 | -2.308077000 | 0.160051000  |
| H | -3.433715000 | -4.225843000 | 0.037607000  |
| H | 0.571279000  | -5.324613000 | -0.199156000 |
| H | 2.923142000  | -4.618119000 | 0.077908000  |
| H | 5.292124000  | -1.015935000 | -0.049658000 |
| H | -1.481047000 | -5.016179000 | 1.468679000  |
| H | -1.141633000 | -3.888346000 | 2.805906000  |
| H | 3.141025000  | -1.776530000 | 2.582108000  |
| H | 4.263919000  | -2.553127000 | 1.438070000  |
| H | -3.526136000 | 0.173882000  | 2.645945000  |
| H | -4.922459000 | 0.142674000  | 1.542984000  |
| H | -1.405404000 | 3.101330000  | -3.455855000 |
| H | -1.670605000 | 4.560123000  | -2.464748000 |
| H | 3.848936000  | 2.992931000  | -2.493204000 |
| H | 2.836035000  | 1.929728000  | -3.504344000 |
| H | -4.997710000 | 1.980812000  | 0.098243000  |
| H | -3.662173000 | 3.972473000  | -0.457708000 |
| H | 0.237610000  | 5.286032000  | -1.275768000 |

|   |              |             |              |
|---|--------------|-------------|--------------|
| H | 2.608384000  | 4.618487000 | -1.283954000 |
| H | 5.211581000  | 1.396873000 | -0.522729000 |
| H | -1.846502000 | 5.016912000 | 0.651590000  |
| H | -1.248561000 | 4.108473000 | 2.065413000  |
| H | 3.274523000  | 2.768431000 | 2.025339000  |
| H | 4.255463000  | 3.231142000 | 0.608324000  |
| C | 0.722253000  | 2.227748000 | 5.717072000  |
| H | -0.119944000 | 2.531665000 | 6.342844000  |
| H | 1.602769000  | 1.973263000 | 6.310978000  |
| H | 0.940509000  | 2.945669000 | 4.925076000  |
| H | 0.400270000  | 1.269549000 | 5.180805000  |

**Imaginary Frequency:**  $i312\text{ cm}^{-1}$

**<sup>3</sup>TS1<sub>Me</sub>**

|    |              |              |              |
|----|--------------|--------------|--------------|
| Fe | -0.023506000 | -0.303890000 | 2.399239000  |
| C  | -0.943049000 | 3.664495000  | 1.406449000  |
| N  | -2.042845000 | 3.609875000  | 0.562263000  |
| C  | -1.722667000 | 3.958330000  | -0.817065000 |
| C  | -0.194705000 | 4.329731000  | -0.743909000 |
| N  | 0.118003000  | 4.170366000  | 0.669198000  |
| N  | 0.430822000  | 3.339696000  | -1.585891000 |
| C  | -0.468599000 | 2.342268000  | -1.953926000 |
| N  | -1.748266000 | 2.834063000  | -1.716553000 |
| C  | -2.919365000 | 2.400406000  | -2.467768000 |
| N  | -3.546343000 | 1.207680000  | -1.966221000 |
| C  | -3.362089000 | -0.013961000 | -2.616980000 |
| N  | -3.844471000 | -1.002702000 | -1.751803000 |
| C  | -4.269129000 | -0.467850000 | -0.489090000 |
| C  | -4.146976000 | 1.082483000  | -0.667705000 |
| N  | -3.287176000 | 1.490597000  | 0.445902000  |
| C  | -2.771401000 | 0.413898000  | 1.100683000  |
| N  | -3.360308000 | -0.730123000 | 0.630286000  |
| C  | -3.638440000 | -2.404514000 | -2.042529000 |
| N  | -2.426418000 | -2.982992000 | -1.471363000 |
| C  | -1.211854000 | -2.925462000 | -2.154407000 |
| N  | -0.302552000 | -3.712768000 | -1.438248000 |
| C  | -0.861695000 | -4.285469000 | -0.245051000 |
| C  | -2.342701000 | -3.735787000 | -0.251566000 |
| N  | -0.306022000 | -3.744387000 | 1.001568000  |
| C  | -1.175140000 | -2.886435000 | 1.597659000  |
| N  | -2.375440000 | -2.928366000 | 0.976336000  |
| C  | 1.076293000  | -3.787137000 | -1.840325000 |
| N  | 1.947599000  | -2.843168000 | -1.119197000 |
| C  | 2.658989000  | -1.881468000 | -1.897610000 |
| N  | 3.719112000  | -1.431016000 | -1.119139000 |
| C  | 3.846223000  | -2.152166000 | 0.118447000  |
| C  | 2.779349000  | -3.292356000 | -0.008146000 |
| N  | 3.376916000  | -1.449911000 | 1.315308000  |



|   |              |              |              |
|---|--------------|--------------|--------------|
| C | 2.319324000  | -2.063477000 | 1.904551000  |
| N | 2.086656000  | -3.258485000 | 1.270531000  |
| C | 4.600433000  | -0.358249000 | -1.585205000 |
| N | 4.121998000  | 0.983340000  | -1.330654000 |
| C | 3.294915000  | 1.624148000  | -2.264157000 |
| N | 2.800580000  | 2.769049000  | -1.641739000 |
| C | 3.269785000  | 2.940113000  | -0.292841000 |
| C | 4.084807000  | 1.625427000  | -0.043744000 |
| N | 2.218295000  | 2.890662000  | 0.723387000  |
| C | 2.165793000  | 1.668056000  | 1.318469000  |
| N | 3.268137000  | 0.939230000  | 0.959051000  |
| C | -3.396394000 | -1.982792000 | 1.359500000  |
| C | 0.963086000  | -4.104829000 | 1.618209000  |
| C | 3.794926000  | -0.147040000 | 1.761032000  |
| O | -0.983464000 | -2.338741000 | -3.182503000 |
| O | 2.369874000  | -1.535821000 | -3.012475000 |
| O | 3.087127000  | 1.278525000  | -3.400291000 |
| O | -0.926489000 | -2.168776000 | 2.586687000  |
| O | -1.921427000 | 0.483663000  | 2.014958000  |
| O | 1.677674000  | -1.598424000 | 2.858269000  |
| O | 1.264094000  | 1.292099000  | 2.095784000  |
| C | 1.723186000  | 3.514717000  | -2.236958000 |
| C | -3.208963000 | 2.870825000  | 0.950233000  |
| C | 1.454390000  | 4.062378000  | 1.180210000  |
| O | -2.923138000 | -0.174015000 | -3.727628000 |
| O | -0.186035000 | 1.237625000  | -2.388995000 |
| O | -0.918824000 | 3.358344000  | 2.582585000  |
| O | -0.170415000 | 0.029026000  | 4.128511000  |
| O | 0.143426000  | -0.681789000 | 0.216648000  |
| H | 0.649650000  | -1.412673000 | -0.200735000 |
| H | -0.030860000 | -0.041920000 | -0.505384000 |
| H | 1.116313000  | -3.518291000 | -2.898832000 |
| H | 1.449486000  | -4.808678000 | -1.702027000 |
| H | 5.582625000  | -0.499038000 | -1.124382000 |
| H | 4.686376000  | -0.451939000 | -2.669697000 |
| H | -3.561590000 | -2.481506000 | -3.129105000 |
| H | -4.496973000 | -2.986474000 | -1.692252000 |
| H | -3.107170000 | -4.517164000 | -0.199481000 |
| H | -0.793045000 | -5.378309000 | -0.237033000 |
| H | 3.212083000  | -4.281523000 | -0.191363000 |
| H | 4.869019000  | -2.511631000 | 0.271089000  |
| H | 5.092373000  | 1.794883000  | 0.351304000  |
| H | 1.202211000  | -5.134220000 | 1.339650000  |
| H | 0.837839000  | -4.041052000 | 2.700162000  |
| H | 3.453089000  | -0.036802000 | 2.791615000  |
| H | 4.887271000  | -0.086463000 | 1.735874000  |
| H | -3.259924000 | -1.780020000 | 2.422644000  |
| H | -4.378697000 | -2.437779000 | 1.204010000  |
| H | -2.631391000 | 2.173829000  | -3.496991000 |
| H | -3.627005000 | 3.236866000  | -2.469313000 |

|   |              |              |              |
|---|--------------|--------------|--------------|
| H | 1.946294000  | 4.587476000  | -2.226798000 |
| H | 1.662409000  | 3.171802000  | -3.272418000 |
| H | -5.277852000 | -0.806105000 | -0.226223000 |
| H | -5.102859000 | 1.614332000  | -0.605340000 |
| H | -2.362659000 | 4.772279000  | -1.170994000 |
| H | 0.032426000  | 5.346053000  | -1.080497000 |
| H | 3.855143000  | 3.858125000  | -0.173370000 |
| H | -4.113143000 | 3.377701000  | 0.600061000  |
| H | -3.211757000 | 2.843306000  | 2.040758000  |
| H | 1.369653000  | 4.020437000  | 2.267452000  |
| H | 2.041465000  | 4.940845000  | 0.896795000  |
| C | -2.023084000 | 1.514568000  | 5.024246000  |
| H | -2.926807000 | 0.923737000  | 4.878391000  |
| H | -1.718072000 | 1.624288000  | 6.064915000  |
| H | -1.933942000 | 2.407805000  | 4.409641000  |
| H | -1.089491000 | 0.773647000  | 4.529848000  |

**Imaginary Frequency:** $i1105\text{ cm}^{-1}$

**<sup>5</sup>P<sub>Me</sub>**

|    |              |              |              |
|----|--------------|--------------|--------------|
| Fe | 0.129862000  | -0.286659000 | 2.359964000  |
| C  | -0.011076000 | 3.633228000  | 1.528065000  |
| N  | -1.171362000 | 3.890037000  | 0.820241000  |
| C  | -0.927731000 | 4.222609000  | -0.579614000 |
| C  | 0.640465000  | 4.247935000  | -0.670882000 |
| N  | 1.052631000  | 3.930684000  | 0.691622000  |
| N  | 0.939958000  | 3.207161000  | -1.621242000 |
| C  | -0.192061000 | 2.455975000  | -1.932297000 |
| N  | -1.300934000 | 3.175396000  | -1.495156000 |
| C  | -2.612195000 | 3.048657000  | -2.124369000 |
| N  | -3.450153000 | 2.020526000  | -1.569972000 |
| C  | -3.609796000 | 0.802478000  | -2.234126000 |
| N  | -4.247132000 | -0.063819000 | -1.336968000 |
| C  | -4.409578000 | 0.521594000  | -0.034092000 |
| C  | -3.964688000 | 2.016497000  | -0.227008000 |
| N  | -2.953607000 | 2.204042000  | 0.811332000  |
| C  | -2.603770000 | 1.020417000  | 1.385918000  |
| N  | -3.466058000 | 0.038574000  | 0.975236000  |
| C  | -4.327489000 | -1.479936000 | -1.623925000 |
| N  | -3.196235000 | -2.278754000 | -1.154366000 |
| C  | -2.100099000 | -2.524870000 | -1.981437000 |
| N  | -1.332111000 | -3.518269000 | -1.361060000 |
| C  | -1.863394000 | -3.941260000 | -0.095266000 |
| C  | -3.170061000 | -3.069721000 | 0.047107000  |
| N  | -1.064509000 | -3.539945000 | 1.068677000  |
| C  | -1.661404000 | -2.531921000 | 1.762349000  |
| N  | -2.906949000 | -2.311262000 | 1.274855000  |
| C  | -0.062514000 | -3.910264000 | -1.911263000 |
| N  | 1.077050000  | -3.191785000 | -1.318039000 |

|   |              |              |              |
|---|--------------|--------------|--------------|
| C | 1.887883000  | -2.406043000 | -2.187683000 |
| N | 3.094993000  | -2.189598000 | -1.532526000 |
| C | 3.208070000  | -2.940281000 | -0.310026000 |
| C | 1.903581000  | -3.805931000 | -0.285995000 |
| N | 3.074693000  | -2.171473000 | 0.927651000  |
| C | 1.981104000  | -2.525891000 | 1.658838000  |
| N | 1.387934000  | -3.610669000 | 1.058942000  |
| C | 4.125149000  | -1.330293000 | -2.115844000 |
| N | 3.993542000  | 0.077156000  | -1.806059000 |
| C | 3.221279000  | 0.912951000  | -2.623328000 |
| N | 3.107375000  | 2.133200000  | -1.956372000 |
| C | 3.768580000  | 2.156443000  | -0.680691000 |
| C | 4.316082000  | 0.688748000  | -0.544085000 |
| N | 2.867692000  | 2.292922000  | 0.465340000  |
| C | 2.682264000  | 1.101250000  | 1.093063000  |
| N | 3.557486000  | 0.178905000  | 0.597338000  |
| C | -3.675547000 | -1.178835000 | 1.734562000  |
| C | 0.149996000  | -4.182978000 | 1.546877000  |
| C | 3.885941000  | -1.043856000 | 1.301850000  |
| O | -1.862468000 | -2.010429000 | -3.045702000 |
| O | 1.563668000  | -2.008277000 | -3.275370000 |
| O | 2.779733000  | 0.647484000  | -3.713056000 |
| O | -1.149944000 | -1.912032000 | 2.715254000  |
| O | -1.664995000 | 0.877707000  | 2.185552000  |
| O | 1.596111000  | -1.956345000 | 2.689618000  |
| O | 1.865821000  | 0.904580000  | 2.012653000  |
| C | 2.166286000  | 3.125560000  | -2.406231000 |
| C | -2.462389000 | 3.489607000  | 1.312636000  |
| C | 2.397898000  | 3.562149000  | 1.032758000  |
| O | -3.302811000 | 0.564196000  | -3.375017000 |
| O | -0.206446000 | 1.368311000  | -2.480202000 |
| O | 0.068273000  | 3.260676000  | 2.690406000  |
| O | 0.196052000  | 0.764334000  | 4.161276000  |
| O | 0.051835000  | -0.686320000 | 0.114957000  |
| H | 0.279877000  | -1.523875000 | -0.341972000 |
| H | -0.099924000 | -0.037810000 | -0.601565000 |
| H | -0.082844000 | -3.659044000 | -2.974558000 |
| H | 0.079466000  | -4.990169000 | -1.786538000 |
| H | 5.103998000  | -1.693749000 | -1.788676000 |
| H | 4.045349000  | -1.415391000 | -3.201548000 |
| H | -4.364961000 | -1.568033000 | -2.711656000 |
| H | -5.244361000 | -1.891212000 | -1.189568000 |
| H | -4.085191000 | -3.658644000 | 0.166439000  |
| H | -2.043370000 | -5.021160000 | -0.064446000 |
| H | 2.078462000  | -4.869098000 | -0.483518000 |
| H | 4.132498000  | -3.527258000 | -0.286401000 |
| H | 5.389206000  | 0.632264000  | -0.331432000 |
| H | 0.118037000  | -5.237685000 | 1.260870000  |
| H | 0.166111000  | -4.102626000 | 2.634705000  |
| H | 3.742040000  | -0.887373000 | 2.372105000  |

|   |              |              |              |
|---|--------------|--------------|--------------|
| H | 4.938779000  | -1.271930000 | 1.108899000  |
| H | -3.392076000 | -1.002496000 | 2.773380000  |
| H | -4.738920000 | -1.431610000 | 1.689681000  |
| H | -2.481957000 | 2.790381000  | -3.177750000 |
| H | -3.101986000 | 4.026079000  | -2.050166000 |
| H | 2.626851000  | 4.119682000  | -2.394900000 |
| H | 1.918447000  | 2.854794000  | -3.435004000 |
| H | -5.435761000 | 0.409318000  | 0.333117000  |
| H | -4.773690000 | 2.743098000  | -0.094167000 |
| H | -1.406007000 | 5.173019000  | -0.836517000 |
| H | 1.054588000  | 5.211742000  | -0.983532000 |
| H | 4.545591000  | 2.927200000  | -0.633994000 |
| H | -3.211576000 | 4.241579000  | 1.047593000  |
| H | -2.380086000 | 3.431586000  | 2.399206000  |
| H | 2.437508000  | 3.492039000  | 2.120910000  |
| H | 3.094346000  | 4.335602000  | 0.694917000  |
| H | 0.052974000  | 1.699507000  | 3.896577000  |
| C | 1.315060000  | 0.672034000  | 5.067490000  |
| H | 1.446949000  | -0.388115000 | 5.285863000  |
| H | 2.219748000  | 1.068407000  | 4.596202000  |
| H | 1.091619000  | 1.215533000  | 5.989003000  |

**<sup>3</sup>P<sub>Me</sub>**

|    |              |              |              |
|----|--------------|--------------|--------------|
| Fe | 0.122390000  | -0.309727000 | 2.232873000  |
| C  | -0.031560000 | 3.590852000  | 1.631911000  |
| N  | -1.189196000 | 3.871120000  | 0.924359000  |
| C  | -0.939012000 | 4.231227000  | -0.466258000 |
| C  | 0.628918000  | 4.271114000  | -0.546777000 |
| N  | 1.035127000  | 3.923063000  | 0.809606000  |
| N  | 0.941532000  | 3.252676000  | -1.517268000 |
| C  | -0.178618000 | 2.483285000  | -1.825204000 |
| N  | -1.298243000 | 3.192591000  | -1.398619000 |
| C  | -2.598402000 | 3.082471000  | -2.055216000 |
| N  | -3.453238000 | 2.051561000  | -1.533771000 |
| C  | -3.615237000 | 0.850743000  | -2.228420000 |
| N  | -4.264505000 | -0.033851000 | -1.357917000 |
| C  | -4.414864000 | 0.516343000  | -0.038117000 |
| C  | -3.978148000 | 2.017989000  | -0.194433000 |
| N  | -2.972743000 | 2.184869000  | 0.851952000  |
| C  | -2.596786000 | 0.984322000  | 1.369918000  |
| N  | -3.455049000 | 0.007505000  | 0.943797000  |
| C  | -4.322047000 | -1.446818000 | -1.670869000 |
| N  | -3.180932000 | -2.237543000 | -1.210702000 |
| C  | -2.083329000 | -2.458774000 | -2.042317000 |
| N  | -1.310608000 | -3.462407000 | -1.445480000 |
| C  | -1.843020000 | -3.923827000 | -0.192552000 |
| C  | -3.157033000 | -3.067059000 | -0.032870000 |
| N  | -1.051780000 | -3.550015000 | 0.983765000  |
| C  | -1.664609000 | -2.573476000 | 1.716792000  |

|   |              |              |              |
|---|--------------|--------------|--------------|
| N | -2.911072000 | -2.349530000 | 1.219987000  |
| C | -0.036921000 | -3.829131000 | -2.000044000 |
| N | 1.095755000  | -3.121751000 | -1.375609000 |
| C | 1.913489000  | -2.316600000 | -2.223455000 |
| N | 3.122125000  | -2.127815000 | -1.563367000 |
| C | 3.227585000  | -2.908721000 | -0.358901000 |
| C | 1.922063000  | -3.773651000 | -0.364313000 |
| N | 3.082898000  | -2.169487000 | 0.895013000  |
| C | 1.979859000  | -2.539224000 | 1.604637000  |
| N | 1.401962000  | -3.619897000 | 0.983845000  |
| C | 4.152663000  | -1.247667000 | -2.115279000 |
| N | 4.012395000  | 0.150822000  | -1.768908000 |
| C | 3.243985000  | 1.004691000  | -2.570443000 |
| N | 3.119437000  | 2.206660000  | -1.872889000 |
| C | 3.774588000  | 2.201937000  | -0.593591000 |
| C | 4.323666000  | 0.731943000  | -0.489654000 |
| N | 2.868367000  | 2.309272000  | 0.551213000  |
| C | 2.679338000  | 1.102453000  | 1.147079000  |
| N | 3.556099000  | 0.191783000  | 0.631288000  |
| C | -3.672323000 | -1.220433000 | 1.690897000  |
| C | 0.158722000  | -4.204127000 | 1.450931000  |
| C | 3.884654000  | -1.047919000 | 1.305457000  |
| O | -1.846100000 | -1.917403000 | -3.093569000 |
| O | 1.591131000  | -1.884783000 | -3.298486000 |
| O | 2.811784000  | 0.766926000  | -3.670308000 |
| O | -1.172126000 | -1.980810000 | 2.689887000  |
| O | -1.635469000 | 0.828942000  | 2.142069000  |
| O | 1.574328000  | -1.977211000 | 2.631286000  |
| O | 1.856196000  | 0.884171000  | 2.056256000  |
| C | 2.170560000  | 3.200480000  | -2.300726000 |
| C | -2.483548000 | 3.456019000  | 1.393384000  |
| C | 2.382998000  | 3.560807000  | 1.146016000  |
| O | -3.299682000 | 0.639823000  | -3.372433000 |
| O | -0.176196000 | 1.386304000  | -2.357651000 |
| O | 0.041838000  | 3.173502000  | 2.778372000  |
| O | 0.110740000  | 0.439169000  | 4.080500000  |
| O | 0.036018000  | -0.699978000 | 0.135473000  |
| H | 0.276986000  | -1.531073000 | -0.331898000 |
| H | -0.089801000 | -0.026393000 | -0.565648000 |
| H | -0.051973000 | -3.543948000 | -3.054795000 |
| H | 0.112540000  | -4.911317000 | -1.908660000 |
| H | 5.130573000  | -1.616032000 | -1.791115000 |
| H | 4.081239000  | -1.303627000 | -3.203451000 |
| H | -4.354889000 | -1.514734000 | -2.760158000 |
| H | -5.234594000 | -1.878559000 | -1.247709000 |
| H | -4.067995000 | -3.667827000 | 0.056281000  |
| H | -2.015894000 | -5.005471000 | -0.194510000 |
| H | 2.095398000  | -4.829492000 | -0.597894000 |
| H | 4.151847000  | -3.495973000 | -0.343553000 |
| H | 5.395123000  | 0.672006000  | -0.269655000 |

|   |              |              |              |
|---|--------------|--------------|--------------|
| H | 0.132422000  | -5.252087000 | 1.140439000  |
| H | 0.170161000  | -4.148233000 | 2.540312000  |
| H | 3.729709000  | -0.920246000 | 2.377883000  |
| H | 4.940333000  | -1.265606000 | 1.116329000  |
| H | -3.387214000 | -1.057992000 | 2.731536000  |
| H | -4.738239000 | -1.461412000 | 1.641925000  |
| H | -2.451132000 | 2.840361000  | -3.110233000 |
| H | -3.082207000 | 4.062423000  | -1.974796000 |
| H | 2.620320000  | 4.198813000  | -2.262875000 |
| H | 1.929414000  | 2.954069000  | -3.337211000 |
| H | -5.435775000 | 0.389207000  | 0.338227000  |
| H | -4.790927000 | 2.738019000  | -0.050898000 |
| H | -1.424496000 | 5.180693000  | -0.712450000 |
| H | 1.038677000  | 5.244003000  | -0.835598000 |
| H | 4.550063000  | 2.972584000  | -0.525561000 |
| H | -3.231470000 | 4.214251000  | 1.143268000  |
| H | -2.411000000 | 3.367059000  | 2.478566000  |
| H | 2.420951000  | 3.465482000  | 2.232291000  |
| H | 3.072170000  | 4.348957000  | 0.827908000  |
| H | 0.039453000  | 1.407960000  | 3.932405000  |
| C | 1.199029000  | 0.149916000  | 4.989407000  |
| H | 1.244648000  | -0.935064000 | 5.069410000  |
| H | 2.139779000  | 0.537269000  | 4.589407000  |
| H | 0.975672000  | 0.593293000  | 5.962599000  |
